# Supplementary material for: Identification of telomere-associated molecules by engineered DNA-binding molecule-mediated chromatin immunoprecipitation (enChIP)
Source: PubMed Central journal article supplement (PMC3821016; doi:10.1038/srep03171), 2013-11-08
Supplement: srep03171-s1.pdf [file srep03171-s1.pdf]

## **Supplemental Materials**

### **Identification of telomere-associated molecules by engineered DNA-binding molecule-mediated chromatin immunoprecipitation (enChIP)**

Toshitsugu Fujita, Yoshinori Asano, Junko Ohtsuka, Yoko Takada, Kazunobu Saito, Rieko Ohki, Hodaka Fujii

Supplemental Methods

Supplemental Figure Legends

Supplemental References

Supplemental Figures 1 - 7

Supplemental Table 1

## Supplemental Methods

**enChIP-PCR.** For detection of  $\gamma$ -satellite sequence, enChIP was performed as described in enChIP-Southern blot analysis except that ChIP DNA Clean & Concentrator (Zyme Research) was used for purification of DNA. The purified DNA was used for PCR with AmpliTaq Gold 360 Master Mix (Applied Biosystems). PCR cycles were as follows: denaturing at 95°C for 10 min; 17 cycles of 95°C for 15 sec, 60°C for 1 min. The primers used in this experiment are 5'-gcgagaaaactgaaaatcac-3' and 5'-tcaagtcgtcaagtggatg-3'<sup>1</sup>. The PCR amplicons were subjected to electrophoresis in 2% agarose gel and visualized in Gel Doc XR (Bio-Rad). The intensity of visualized bands was analyzed using Scion Imaging Software (Scion Corporation).

**Identification of proteins by LC-MS/MS.** After staining with Coomassie Brilliant Blue, the each lane was cut into 5 slices. Each slice was digested with trypsin, and the obtained peptides were dried and then dissolved in 0.1% trifluoroacetic acid, 2% acetonitrile prior to LC-MS/MS analysis. Peptides were analysed using a nanoLC-MS/MS system, composed of an LTQ Orbitrap Velos (Thermo Fisher Scientific) coupled with a nanoLC (Advance, Michrom BioResources) and an HTC-PAL autosampler (CTC Analytics). Peptide separation was carried out using the C18 reversed phase analytical column (0.1 mm ID x 15 cm, 3  $\mu$ m resin, L-column Micro; CELI). The mobile phases consisted of 0.1% formic acid and 100% acetonitrile. Peptides were eluted by a gradient of 5–35% acetonitrile for 105 min at a flow rate of 500 nl/min. CID spectra were acquired automatically in the data-dependent scan mode with the dynamic exclusion option. Full MS was obtained by Orbitrap in the range of m/z 300–1,500 with resolution 30,000. The nine most intense precursor ions in the full MS spectra were selected for subsequent MS/MS analysis

in an ion trap with the automated gain control mode. The lock mass function was activated to minimize mass error during analysis.

**Database searching.** Tandem mass spectra were extracted, then charge state was deconvoluted and deisotoped by Proteome Discoverer version 1.2. All MS/MS samples were analyzed using Mascot (Matrix Science, London, UK; version 2.4.1) and X! Tandem (The GPM, thegpm.org; version CYCLONE (2010.12.01.1)). X! Tandem was set up to search the SwissProt\_2012 database (535248 entries) also assuming the digestion enzyme as trypsin. Mascot was set up to search the SwissProt\_2013\_08 database (selected for *Mus musculus*, 16625 entries) assuming the digestion enzyme as trypsin. Mascot and X! Tandem were searched with a fragment ion mass tolerance of 0.80 Da and a parent ion tolerance of 10.0 PPM. Iodoacetamide derivative of cysteine was specified in Mascot and X! Tandem as a fixed modification. S-carbamoylmethylcysteine cyclization (N-terminus) of the n-terminus, oxidation of methionine and acetylation of the n-terminus were specified in Mascot and X! Tandem as variable modifications.

**Criteria for protein identification.** Scaffold (version Scaffold\_3.4.5, Proteome Software Inc., Portland, OR) was used to validate MS/MS based peptide and protein identifications. Peptide identifications were accepted if they could be established at greater than 95.0% probability as specified by the Peptide Prophet algorithm<sup>2</sup>. Protein identifications were accepted if they could be established at greater than 99.0% probability and contained at least 2 identified peptides. Protein probabilities were assigned by the Protein Prophet algorithm<sup>3</sup>. These thresholds resulted in a protein false discovery rate (FDR) of < 0.1% as calculated by Scaffold. Proteins that

contained similar peptides and could not be differentiated based on MS/MS analysis alone were grouped to satisfy the principles of parsimony. MS data were converted using PRIDE Converter 2 Tool Suite (version 2.0.19)<sup>4</sup> and deposited in the PRIDE database (<http://www.ebi.ac.uk/pride>)<sup>5-7</sup> under accession numbers [31251-31256].

**Quantification using spectral counting.** Label-free quantification of relative protein abundance was performed by spectral counting<sup>8</sup> using all spectra matched to a peptide sequence. Relative protein abundance was calculated on the basis of the unweighted spectral count assigned to each identified protein by Scaffold. The unweighted spectral count includes spectra matched to peptides shared between multiple proteins if there is independent evidence that these proteins are present. To normalize the data, spectral counts were expressed as a percentage of the total number of spectra expressed as a percentage of the total number of spectra observed in the entire sample. sd and p-values were calculated from three biological replicates. p-values were calculated by t-test.

## **Supplemental Figure Legends**

**Supplemental Figure 1.** Nucleotide and amino acid sequences of 3xFN-Tel-TAL. Sequences of 3xFLAG-tag, V5 epitope-tag and NLS are highlighted.

**Supplemental Figure 2.** The full-length blot of Figure 2b including molecular size marker.

**Supplemental Figure 3.** The full-length blot of Figure 2d including molecular size marker.

**Supplemental Figure 4.** The amounts of  $\gamma$ -satellite repeats in enChIP samples.  $\gamma$ -satellite repeats in enChIP samples were quantified by PCR.

**Supplemental Figure 5.** SDS-PAGE and CBB staining. The stained regions were divided into 5 parts (2-4 mm height each), excised, and subjected to in-gel tryptic digestion. The digested peptides were analyzed in LC-MS/MS.

**Supplemental Figure 6.** Localization of candidate proteins at telomeres. U2OS cells were transfected with the expression vector of ECFP-TRF2 together with those of Halo-tagged proteins. Cells were treated with TMR ligand (5  $\mu$ M) for 15 min at 37°C 23 h post transfection, fixed with 4% paraformaldehyde, and subjected to immunofluorescence microscopy. Thirty cells expressing both ECFP-TRF2 and Halo-tagged proteins were randomly picked up and analyzed as Figure 2.

**Supplemental Figure 7.** The full-length gel image of Figure 4.

## Supplemental References

1. Kishi, Y., Kondo, S. & Gotoh, Y. Transcriptional activation of mouse major satellite regions during neuronal differentiation. *Cell Struct. Funct.* **37**, 101-110 (2012).
2. Keller, A., Nesvizhskii, A.I., Kolker, E. & Aebersold, R. Empirical statistical model to estimate the accuracy of peptide identifications made by MS/MS and database search. *Anal Chem* **74**, 5383-5392 (2002).
3. Nesvizhskii, A.I., Keller, A., Kolker, E. & Aebersold, R. A statistical model for identifying proteins by tandem mass spectrometry. *Anal Chem* **75**, 4646-4658 (2003).
4. Barsnes, H., Vizcaíno, J.A., Eidhammer, I. & Martens, L. PRIDE Converter: Making proteomics data-sharing easy. *Nat. Biotechnol.* **27**, 598-599 (2009).
5. Vizcaíno, J.A. et al. The Proteomics Identifications database: 2010 update. *Nucleic Acids Res.* **38**, D736-D742 (2010).
6. Old, W.M. et al. Comparison of label-free methods for quantifying human proteins by shotgun proteomics. *Mol. Cell. Proteomics* **4**, 1487-1502 (2005).
7. Zybaylov, B., Coleman, M.K., Florens, L. & Washburn, M.P. Correlation of relative abundance ratios derived from peptide ion chromatograms and spectrum counting for quantitative proteomic analysis using stable isotope labeling. *Anal. Chem.* **77**, 6218-6224 (2005).
8. Liu, H.B., Sadygov, R.G. & Yates, J.R. A model for random sampling and estimation of relative protein abundance in shotgun proteomics. *Anal. Chem.* **76**, 4193-4201 (2004).

# Supplemental Figure 1

**3xFLAG-tag**

1 **M D Y K D H D G D Y K D H D I D Y K D D D D K** L A A G R A T 30  
 1 ATG GAC TAC AAA GAC CAT GAC GGT GAT TAT AAA GAT CAT GAC ATC GAT TAC AAG GAT GAC GAT GAC AAG CTT GCG GCC GGC CGC GCC ACC 90

**V5 epitope-tag** **NLS**

31 **M G K P I P N P L L G L D S T** G G M A P **K K K R K** V D G G V 60  
 91 ATG GGA AAA CCT ATT CCT AAT CCT CTG CTG GGC CTG GAT TCT ACC GGA GGC ATG GCC CCT AAG AAA AAG CCG AAG GTG GAC GGC GGA GTG 180

61 D L R T L G Y S Q Q Q Q E K I K P K V R S T V A Q H H E A L 90  
 181 GAC CTG AGA ACA CTG GGA TAT TCT CAG CAG CAG CAG GAG AAG ATC AAG CCC AAG GTG AGA TCC ACA GTG GCC CAG CAC CAC GAA GCC CTG 270

91 V G H G F T H A H I V A L S Q H P A A L G T V A V K Y Q D M 120  
 271 GTG GGA CAC GGA TTT ACA CAC GCC CAC ATT GTG GCC CTG TCT CAG CAC CCT GCC GCC CTG GGA ACA GTG GCC GTG AAA TAT CAG GAT ATG 360

121 I A A L P E A C T H E A I V G G V G K Q W S G A R A L E A L L T 150  
 361 ATT GCC ACC CTG CCT GAG GCC ACA CAC GAA GCC ATT GTG GGA GTG GGA AAA CAG TGG TCT GGA GCC AGA GCC CTG GAA GCC CTG ACA 450

151 V A G E L R G P P L Q L D T G Q L L K I A K R G G V T A V E 180  
 451 GTG GCC GGA GAA CTG AGA GGA CCT CCT CTG CAG CTG GAT ACA GGA CAG CTG CTG AAG ATT GCC AAA AGG GGC GGA GTG ACC GCG GTG GAA 540

181 A V H A W R N A L T G A P L N L T P E Q V V A I A S N I G G 210  
 541 GCC GTG CAC GCC TGG AGA AAT GCC CTG ACA GGA GCC CCT CTG AAC CTG ACC CCC GAA CAG GTG GTG GCC ATT GCC AGC AAC ATC GGC GGC 630

211 K Q A L E T V Q R L L P V L C Q A H G L T P E Q V V A I A S 240  
 631 AAG CAG ACC CTG GAA ACC GTG CAG AGA CTG CAG CTG CTG TGC CTG GCA CCA CCT GAA CAG GTG GTG GCT ATC GCT TCT 720

241 N N G G K Q A L E T V Q R L L P V L C Q A H G L T P E Q V V 270  
 721 AAC AAC GGA GGA AAA CAG GCT CTG GAA ACA GTG CAG CGG CTG CTG CCT GTG CTG TGT CAG GCT CAC GGC TTG ACT CCA GAA CAG GTG GTG 810

271 A I A S N N G G K Q A L E T V Q R L L P V L C Q A H G L T P 300  
 811 GCT ATT GCT TCC AAC AAC GGG GGG AAA CAG GCC CTG GAA ACT GTG CAG CGC CTG CTG CCA GTG CTG TGC CAG GCT CAC GGA CTG ACC CCC 900

301 E Q V V A I A S N N G G K Q A L E T V Q R L L P V L C Q A H 330  
 901 GAA CAG GTG GTG GCC ATT GCC AAC AAC GGC GGC AAG CAG GCC CTG GAA ACC GTG CAG AGA CTG CTG CCC GTG CTG TGC CAG GCC CAT 990

331 G L T P E Q V V A I A S N G G G K Q A L E T V Q R L L P V L 360  
 991 GGC CTG ACA CCT GAA CAG GTG GTG GCT ATC GCC TCT AAC GGC GGA GGA AAA CAG GCT CTG GAA ACA GTG CAG CGG CTG CTG CCT GTG CTG 1080

361 C Q A H G L T P E Q V V A I A S N G G G K Q A L E T V Q R L 390  
 1081 TGT CAG GCT CAC GGC TTG ACT CCA GAA CAG GTG GTG GCT ATT GCT TCC AAC GGC GGG GGG AAA CAG GCC CTG GAA ACT GTG CAG GCG CTG 1170

391 L P V L C Q A H G L T P E Q V V A I A S N I G G K Q A L E T 420  
 1171 CTG CCA GAA CAG GTG TGC GCT CAC GGC CTG ACC CCC GAA CAG GTG GTG GCC ATT GCC AGC AAC ATC GGC GAG CAG GCT CCA GAA ACC 1260

421 V Q R L L P V L C Q A H G L T P E Q V V A I A S N N G G K Q 450  
 1261 GTG CAG AGA CTG CTG CCC GTG CTG TGC CAG GCC CAT GGC CTG ACA CCT GAA CAG GTG GTG GCT ATC GCC TCT AAC AAC GGA GGA AAA CAG 1350

451 A L E T V Q R L L P V L C Q A H G L T P E Q V V A I A S N N 480  
 1351 GCT CTG GAA ACA GTG CAG CGG CTG CTG CCT GTG CTG TGT CAG GCT CAC GGC TTG ACT CCA GAA CAG GTG GTG GCT ATT GCT TCC AAC AAC 1440

481 G G K Q A L E T V Q R L L P V L C Q A H G L T P E Q V V A I 510  
 1441 GGG GGG AAA CAG GCC CTG GAA ACT GTG CAG CGC CTG CTG CTG GCA GGC CTG CAC GGC CTC ACT CCC GAG CAG GCT CCA GAA ACC 1530

511 A S N N G G K Q A L E T V Q R L L P V L C Q A H G L T P E Q 540  
 1531 GCC AGC AAC AAC GGC GGC AAG CAG GCC CTG GAA ACC GTG CAG AGA CTG CTG CCC GTG CTG TGC CAG GCC CAT GGC CTG ACA CCT GAA CAG 1620

541 V V A I A S N G G G K Q A L E T V Q R L L P V L C Q A H G L 570  
 1621 GTG GTG GCT ATC GCC TCT AAC GGC GGA GGA AAA CAG GCT CTG GAA ACA GTG CAG CGG CTG CTG CCT GTG CTG TGT CAG GCT CAC GGC TTG 1710

571 T P E Q V V A I A S N G G G G K Q A L E T V Q R L L P V L C 600  
 1711 ACT CCA GAA CAG GTG GTG GCT ATT GCT TCC AAC GGC GGG GGG AAA CAG GCC CTG GAA ACT GTG CAG CGC CTG CTG CCA GTG CTG TGC CAG 1800

601 A H G L T P E Q V V A I A S N I G G K Q A L E T V Q R L L P 630  
 1801 GCT CAC GGA CTG ACC CCC GAA CAG GTG GTG GCC ATT GCC AGC AAC ATC GGC GGC AAG CAG GCC CTG GAA ACC GTG CAG AGA CTG CTG CCC 1890

631 V L C Q A H G L T P E Q V V A I A S N N G G K Q A L E T V Q 660  
 1891 GTG CTG TGC CAG GCC CAT GGC CTG ACA CCT GAA CAG GTG GTG GCT ATC GCC TCT AAC AAC GGA GGA AAA CAA GCA CTC GAG ACA GTG CAG 1980

661 R L L P V L C Q A H G L T P E Q V V A I A S N N G G K Q A L 690  
 1981 CCG CTG CTG CCT GTG CTG TGT CAG GCT CAC GGC TTG ACT CCA GAA CAG GTG GTG GCT ATT GCT TCC AAC AAC GGG GGG AAA CAG GCC CTG 2070

691 E T V Q R L L P V L C Q A H G L T P E Q V V A I A S N N G G 720  
 2071 GAA ACT GTG CAG CGC CTG CTG CCA GTG CTG TGC CAG GCT CAC GGC CTG ACC CCC GAA CAG GTG GTG GCC ATT GCC AGC AAC AAC GGC GGC 2160

721 K Q A L E T V Q R L L P V L C Q A H G L T P E Q V V A I A S 750  
 2161 AAG CAG GCC CTG GAA ACC GTG CAG AGA CTG CTG CCC GTG CTG TGC CAG GCC CAT GGC CTG ACA CCT GAA CAG GTG GTG GCT ATC GCC TCT 2250

751 N G G G K Q A L E T V Q R L L P V L C Q A H G L T P Q V V 780  
 2251 AAC GGC GGA GGA AAA CAG GCT CAC GGC GAA ACA GTG CAG CGG CTG CTG CCT GTG TGT CAG GCT CAC GGC TTG ACT CCA CAG QAG GTC GTG 2340

781 A I A S N G G G R P A L E S I V A Q L S R P D P A L A A L T 810  
 2341 GCA ATT GCT AGC AAC GGC GGC GGA CGG CCC GCC CTG GAG AGC ATT GTG GCC CAG CTG TCT AGA CCT GAT CCT GCC CTG GCC GCC CTG ACA 2430

811 N D H L V A L A C L G G R P A L D A V K K G L P H A P A L I 840  
 2431 AAT GAT CAC CTG GTG GCC CTG TGT CTG GGA GGC AGA CCT GCC CTG GAT GCC GTG AAA AAA GGA CTG CCT CAC GCC CCF GCC CTG ATC 2520

841 K R T N R R I P E R T S H R V A D H A Q V V R V L G F F Q C 870  
 2521 AAG AGA ACA AAT AGA AGA ATC CCC GAG CGG ACC TCT CAC AGA GTG GCC ATG CAC GCC CAG GTG GTG AGA GTG CTG GGA TTT TTT CAG TGT 2610

871 H S H P A Q A F D D A M T Q F G M S R H G L L Q L F R R V G 900  
 2611 CAC TCT CAC CCT GCC CAG GCC TTT GAT GAT GCC ATG ACA CAG TTT GGC ATG AGC AGA CAC GGA CTG CTG CAG CTG TTT AGA AGA GTG GGA 2700

901 V T E L E A R S G T L P P A S Q R W D R I L Q G S R L I H R 930  
 2701 GTG ACA GAA CTG GAG GCC AGA TCC GGA ACC CTG CCT CCT GCC TCT CAG AGA TGG GAT AGG ATT CTG CAG GGT TCC CGT TTA ATT CAT CGA 2790

931 \* 931  
 2791 TAG 2793



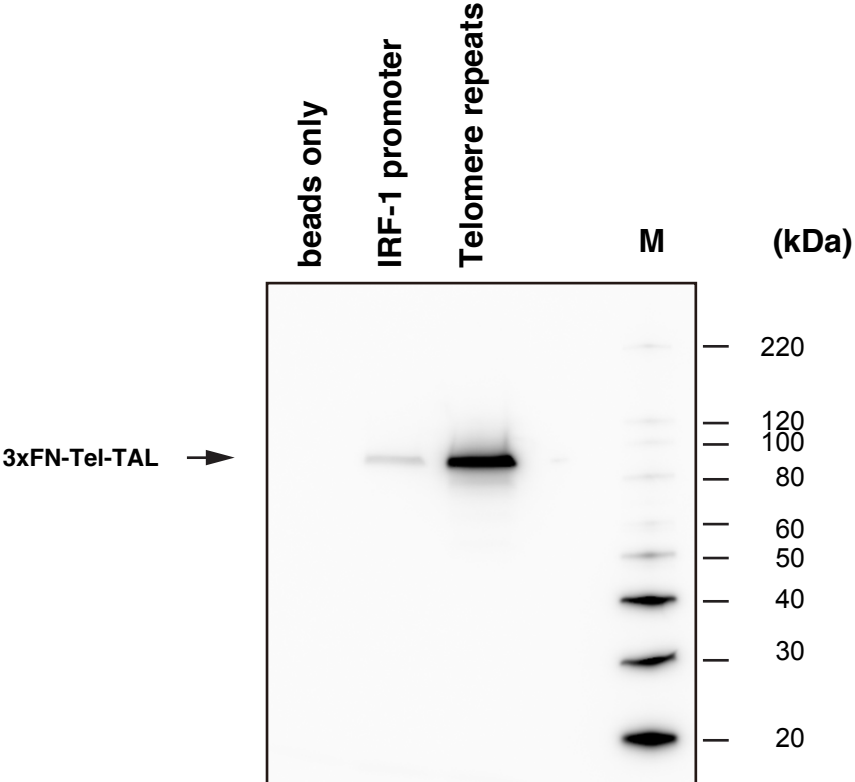

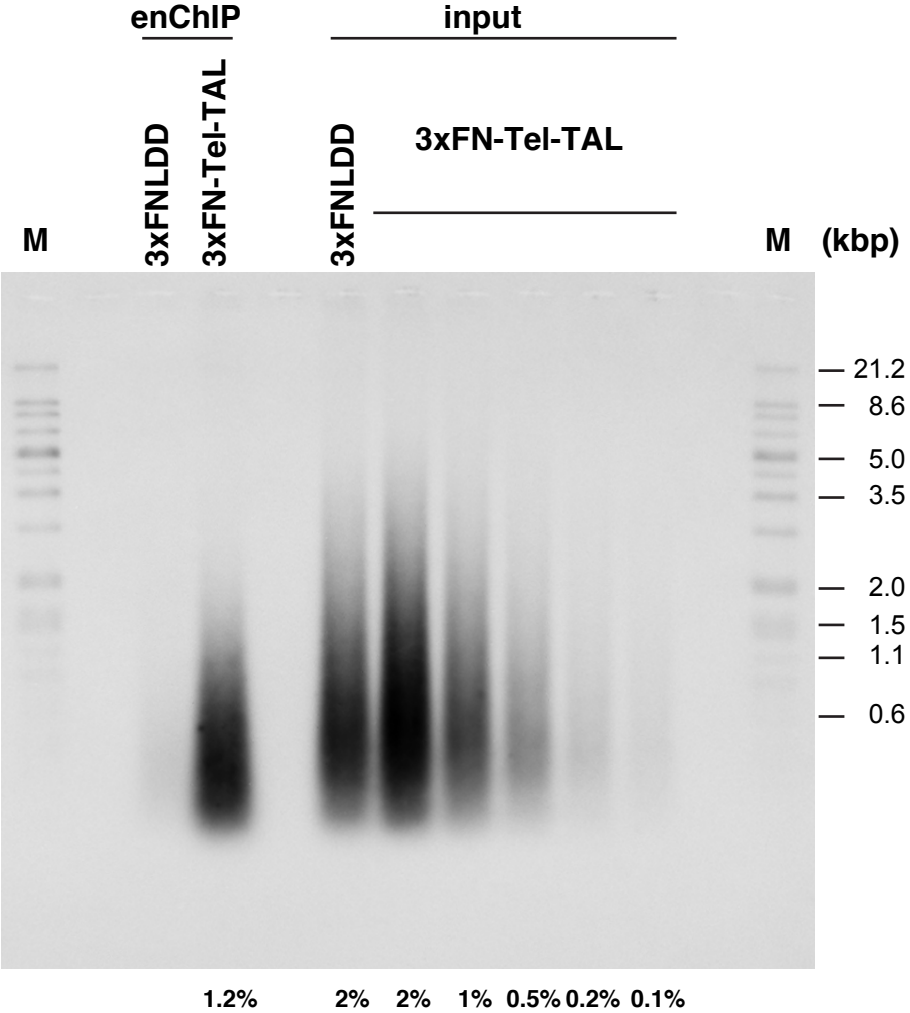

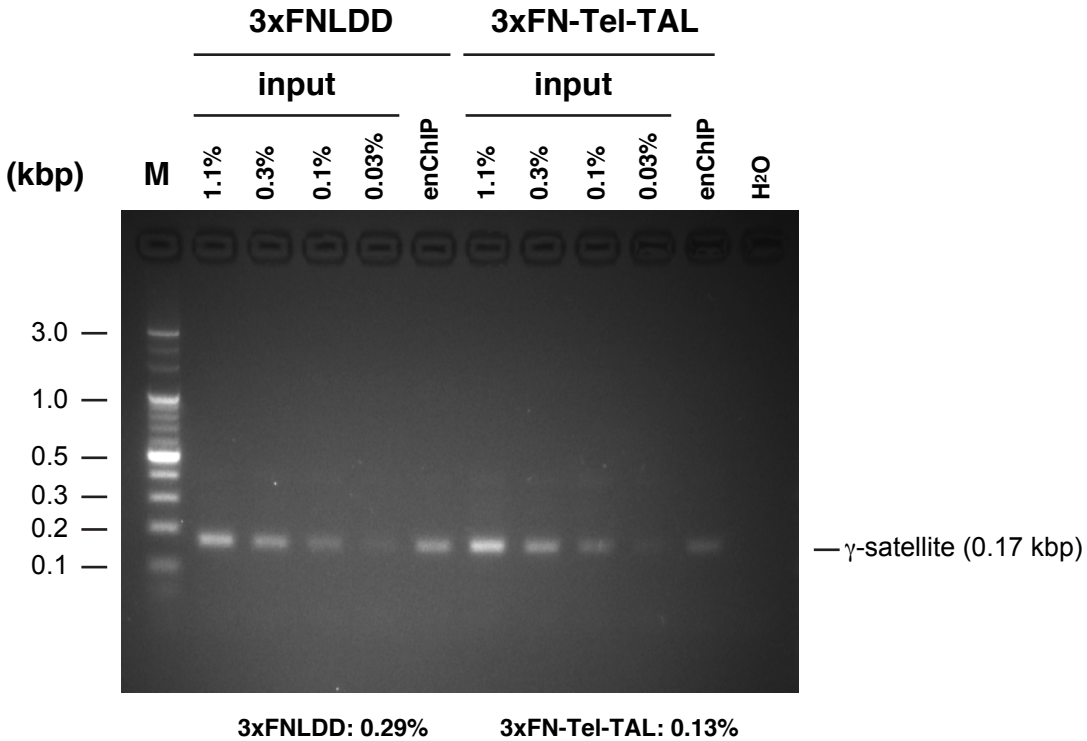

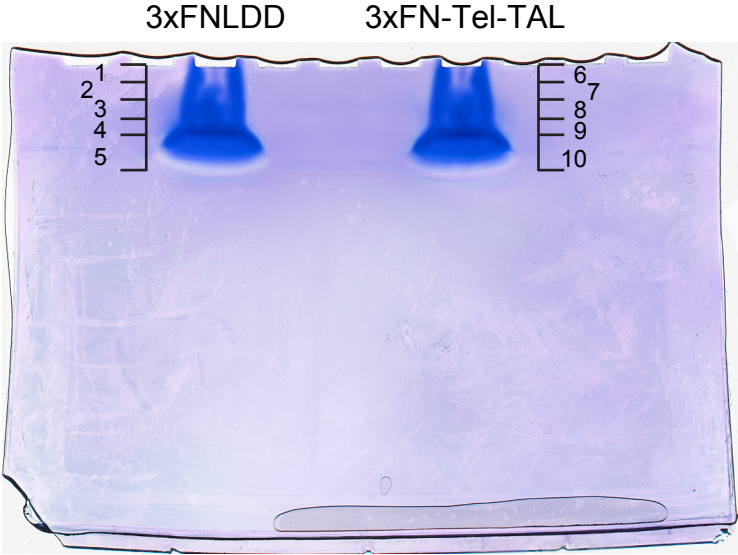

# Supplemental Figure 6

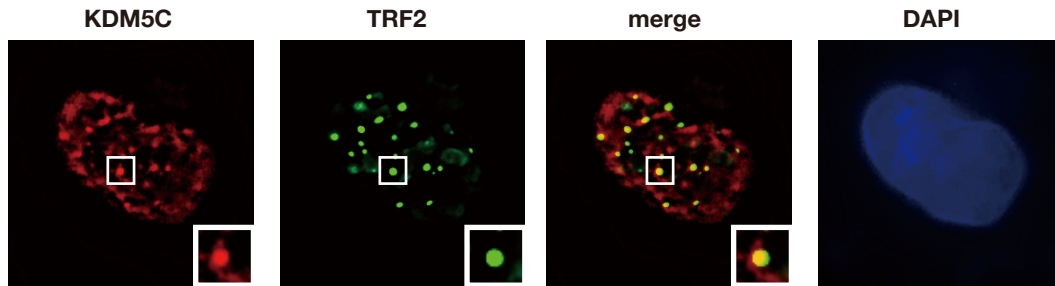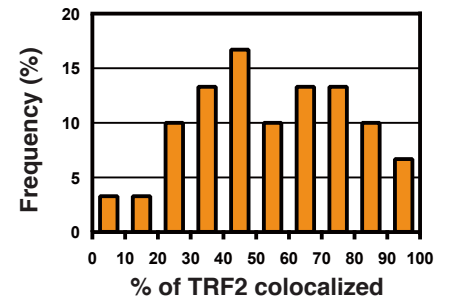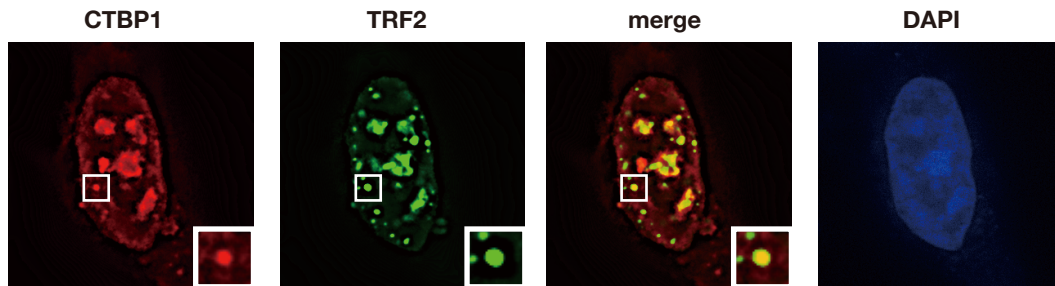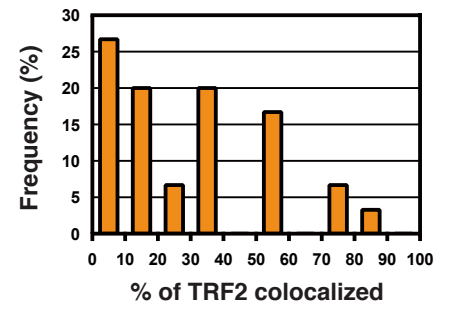

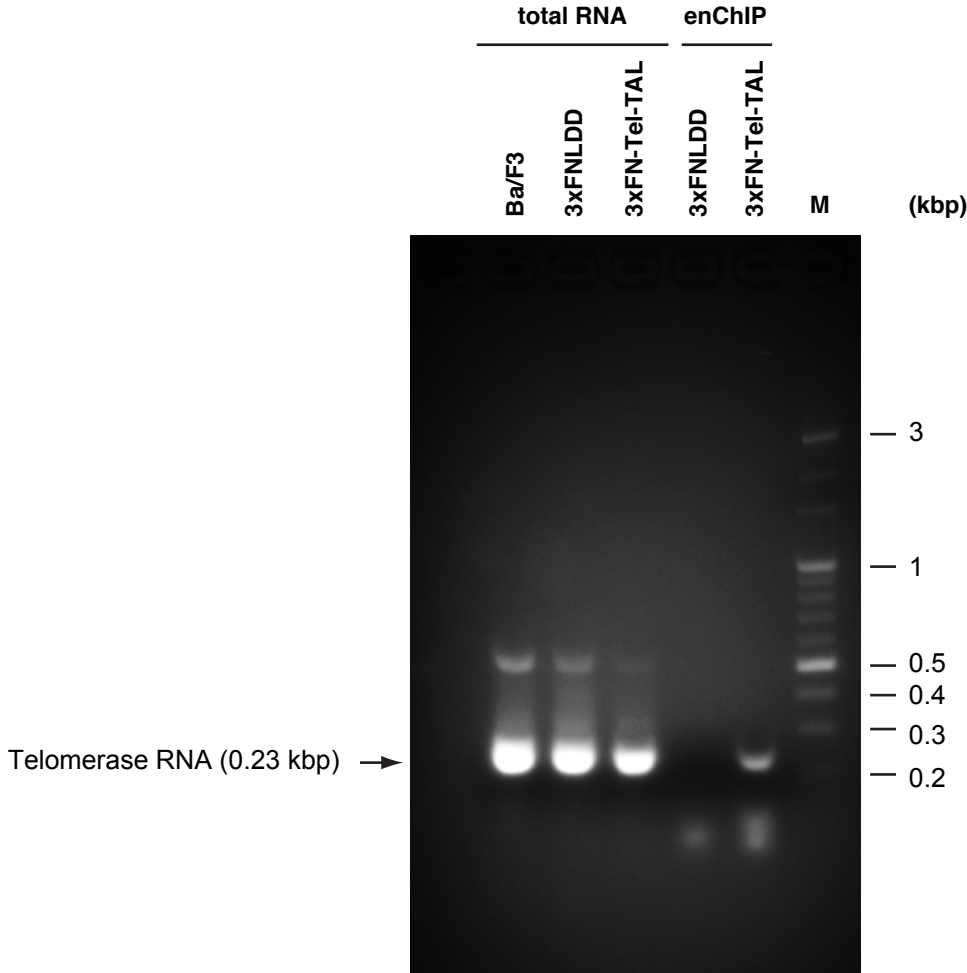

Supplemental Table 1

| #  | Identified Proteins (714)                                                                          | Accession Number | Molecular Weight | Control  |          | Sample   |          | pSB   | Ref.                                                                                                           | T-Test (p-Value)                                                           |
|----|----------------------------------------------------------------------------------------------------|------------------|------------------|----------|----------|----------|----------|-------|----------------------------------------------------------------------------------------------------------------|----------------------------------------------------------------------------|
|    |                                                                                                    |                  |                  | Control  | Sample   | Control  | Sample   |       |                                                                                                                |                                                                            |
|    |                                                                                                    |                  |                  | Average  | SD       | Average  | SD       |       |                                                                                                                |                                                                            |
|    |                                                                                                    |                  |                  | ln(FOLD) | ln(FOLD) | ln(FOLD) | ln(FOLD) |       |                                                                                                                |                                                                            |
| 1  | Avian protein AurB2 OS-Xanthomonas euvesicatoria GN-AurB3 PE1 SV-2                                 | AVR83_XANEU      | 123 kDa          | 0        | 0        | 3858     | 14.1     | RDV/0 | 3dFVN-Telomere-TAL                                                                                             | 855 (0.011)                                                                |
| 2  | Zinc finger protein Helios OS-Mus musculus GN-Hzr2 PE1 SV-2                                        | IKZF2_MOUSE      | 59 kDa           | 0        | 0        | 1373     | 2.46     | RDV/0 |                                                                                                                | 855 (0.0064)                                                               |
| 3  | RIS proteinase non-ATPase regulatory subunit 3 OS-Mus musculus GN-Prnd1 PE-2 SV-4                  | PRMS3_MOUSE      | 85 kDa           | 0        | 0        | 1268     | 2.18     | RDV/0 |                                                                                                                | 855 (0.0056)                                                               |
| 4  | ATP-dependent RNA helicase A OS-Bos taurus GN-DHX9 PE-2 SV-1                                       | DHX9_BOVIN       | 142 kDa          | 0        | 0        | 1182     | 26.64    | RDV/0 |                                                                                                                | 855 (0.37)                                                                 |
| 5  | 14-3-3 protein gamma OS-Mus musculus GN-Yahap PE1 SV-2                                             | 14333_MOUSE      | 28 kDa           | 0        | 0        | 817      | 8.57     | RDV/0 | 14-3-3 beta and c bind to TERT                                                                                 | 855 (0.14)                                                                 |
| 6  | DnaJ homolog subfamily A member 1 OS-Mus musculus GN-Dnaj1 PE1 SV-1                                | DNAJ1_MOUSE      | 49 kDa           | 0        | 0        | 846      | 27.1     | RDV/0 |                                                                                                                | 855 (0.007)                                                                |
| 7  | Protein-protein kinase ETK OS-Mus musculus GN-ERK1 PE1 SV-4                                        | ETK_MOUSE        | 78 kDa           | 0        | 0        | 845      | 3.06     | RDV/0 |                                                                                                                | 855 (0.044)                                                                |
| 8  | Guanine nucleotide-binding protein G(i)(o)/G(i)(t) subunit beta-2 OS-Mus musculus GN-Gi2b PE1 SV-3 | GBB2_MOUSE       | 37 kDa           | 0        | 0        | 827      | 8.09     | RDV/0 |                                                                                                                | 855 (0.12)                                                                 |
| 9  | Apoptase-promoting complex subunit 1 OS-Mus musculus GN-Apoc1 PE1 SV-2                             | APC1_MOUSE       | 218 kDa          | 0        | 0        | 56       | 3.13     | RDV/0 |                                                                                                                | 855 (0.26)                                                                 |
| 10 | Zinc finger protein ZFP91 OS-Mus musculus GN-Zfp91 PE1 SV-1                                        | ZFP91_MOUSE      | 108 kDa          | 0        | 0        | 543      | 1.66     | RDV/0 |                                                                                                                | 855 (0.056)                                                                |
| 11 | 14-3-3 protein eta OS-Mus musculus GN-Yahap PE1 SV-2                                               | 14337_MOUSE      | 28 kDa           | 0        | 0        | 531      | 4.68     | RDV/0 | 14-3-3 beta and c bind to TERT                                                                                 | 855 (0.12)                                                                 |
| 12 | Regulator of nonsense transcripts 1 OS-Mus musculus GN-Rgt1 PE1 SV-2                               | RENT1_MOUSE      | 124 kDa          | 0        | 0        | 518      | 7.43     | RDV/0 |                                                                                                                | 855 (0.30)                                                                 |
| 13 | Histone deacetylase 2 OS-Mus musculus GN-Hdac2 PE1 SV-1                                            | H2AC2_MOUSE      | 95 kDa           | 0        | 0        | 504      | 4.54     | RDV/0 |                                                                                                                | 855 (0.13)                                                                 |
| 14 | Proteasome subunit alpha type 4 OS-Mus musculus GN-Panp4 PE1 SV-1                                  | PSA4_MOUSE       | 29 kDa           | 0        | 0        | 498      | 1.84     | RDV/0 |                                                                                                                | 855 (0.062)                                                                |
| 15 | Repression factor C subunit 4 OS-Mus musculus GN-Rfc4 PE1 SV-1                                     | RFC4_MOUSE       | 40 kDa           | 0        | 0        | 454      | 4.14     | RDV/0 |                                                                                                                | 855 (0.13)                                                                 |
| 16 | Transforming protein RhoA OS-Mus musculus GN-Rhoa PE1 SV-1                                         | RHOA_MOUSE       | 22 kDa           | 0        | 0        | 424      | 3.77     | RDV/0 |                                                                                                                | 855 (0.12)                                                                 |
| 17 | Fatty acid-binding protein, isoform 2 OS-Mus musculus GN-Fabp PE1 SV-3                             | FABP2_MOUSE      | 15 kDa           | 0        | 0        | 424      | 3.77     | RDV/0 |                                                                                                                | 855 (0.12)                                                                 |
| 18 | Importin-5 OS-Mus musculus GN-Import5 PE1 SV-3                                                     | IPUS_MOUSE       | 124 kDa          | 0        | 0        | 412      | 1.3      | RDV/0 |                                                                                                                | 855 (0.0054)                                                               |
| 19 | MDS1 and EVI1 complex locus protein EVI1 OS-Mus musculus GN-Mecom PE1 SV-1                         | EVI1_MOUSE       | 117 kDa          | 0        | 0        | 411      | 1.93     | RDV/0 |                                                                                                                | 855 (0.21)                                                                 |
| 20 | Nine-oxygen synthase-interacting protein OS-Mus musculus GN-Niip PE-2 SV-1                         | NIIP_MOUSE       | 25 kDa           | 0        | 0        | 397      | 1.1      | RDV/0 |                                                                                                                | 855 (0.16)                                                                 |
| 21 | Diphthaloyl reductase OS-Mus musculus GN-Dmr PE1 SV-3                                              | DPR_MOUSE        | 25 kDa           | 0        | 0        | 387      | 3.83     | RDV/0 |                                                                                                                | 855 (0.14)                                                                 |
| 22 | Cell division cycle protein 23 homolog OS-Mus musculus GN-Cdc23 PE1 SV-2                           | CDC23_MOUSE      | 69 kDa           | 0        | 0        | 364      | 1.26     | RDV/0 |                                                                                                                | 855 (0.074)                                                                |
| 23 | RNA polymerase II subunit A C-terminal domain phosphatase 55U72 OS-Mus musculus GN-Su72 PE-2 SV-1  | SU72_MOUSE       | 23 kDa           | 0        | 0        | 337      | 1.17     | RDV/0 |                                                                                                                | 855 (0.075)                                                                |
| 24 | Transcription repressor Zfp281 OS-Mus musculus GN-Zfp281 PE1 SV-1                                  | ZFP281_MOUSE     | 85 kDa           | 0        | 0        | 335      | 0.22     | RDV/0 |                                                                                                                | 855 (0.00015)                                                              |
| 25 | Transcription initiation factor 3B OS-Mus musculus GN-Tf3b PE1 SV-1                                | TF3B_MOUSE       | 35 kDa           | 0        | 0        | 334      | 1.03     | RDV/0 |                                                                                                                | 855 (0.0050)                                                               |
| 26 | Histidine triad nucleotide-binding protein 1 OS-Mus musculus GN-Hit1 PE1 SV-3                      | HIT1_MOUSE       | 14 kDa           | 0        | 0        | 32       | 3.16     | RDV/0 |                                                                                                                | 855 (0.15)                                                                 |
| 27 | Tubulin-folding cofactor B OS-Mus musculus GN-Tfc1b PE1 SV-2                                       | TFC1B_MOUSE      | 27 kDa           | 0        | 0        | 32       | 3.16     | RDV/0 |                                                                                                                | 855 (0.15)                                                                 |
| 28 | Myohyalin-related protein 3 OS-Homo sapiens GN-Myh3 PE1 SV-3                                       | MYH3_HUMAN       | 124 kDa          | 0        | 0        | 315      | 0.94     | RDV/0 |                                                                                                                | 855 (0.37)                                                                 |
| 29 | Alpha-synuclein NSF attachment protein OS-Mus musculus GN-Nsnp PE1 SV-1                            | NSNA_MOUSE       | 33 kDa           | 0        | 0        | 307      | 1.19     | RDV/0 |                                                                                                                | 855 (0.11)                                                                 |
| 30 | Eukaryotic translation initiation factor 4H OS-Mus musculus GN-Eif4h PE1 SV-3                      | EIF4H_MOUSE      | 27 kDa           | 0        | 0        | 302      | 2.79     | RDV/0 |                                                                                                                | 855 (0.13)                                                                 |
| 31 | Transcriptin 1 OS-Mus musculus GN-Tpct1 PE1 SV-1                                                   | TPCT1_MOUSE      | 102 kDa          | 0        | 0        | 301      | 3.17     | RDV/0 |                                                                                                                | 855 (0.18)                                                                 |
| 32 | DNA polymerase alpha subunit B OS-Mus musculus GN-Pol2 PE1 SV-2                                    | DPO2_MOUSE       | 66 kDa           | 0        | 0        | 254      | 1.36     | RDV/0 | CPOLA binds to telomere protein Cdc13 in budding yeast. 14-3-3-related mouse cell line shows telomere deficit. | 855 (0.20)                                                                 |
| 33 | Repression protein A 32 kDa subunit OS-Mus musculus GN-Rpa2 PE1 SV-1                               | RFA2_MOUSE       | 30 kDa           | 0        | 0        | 25       | 2.73     | RDV/0 |                                                                                                                | 855 (0.14)                                                                 |
| 34 | Nuclear factor NF-kappa-B p105 subunit OS-Mus musculus GN-Nfya1 PE1 SV-2                           | NFYA_MOUSE       | 100 kDa          | 0        | 0        | 23       | 2.73     | RDV/0 |                                                                                                                | 855 (0.14)                                                                 |
| 35 | Protein SIRT4 OS-Mus musculus GN-Sirt4 PE1 SV-2                                                    | SIRT4_MOUSE      | 69 kDa           | 0        | 0        | 23       | 2.73     | RDV/0 |                                                                                                                | 855 (0.056)                                                                |
| 36 | Signal transducer and activator of transcription 5A OS-Mus musculus GN-Stat5a PE1 SV-1             | STAT5A_MOUSE     | 91 kDa           | 0        | 0        | 24       | 2.33     | RDV/0 |                                                                                                                | 855 (0.13)                                                                 |
| 37 | Adenylyltransferase and sulfuryltransferase MDC53 OS-Mus musculus GN-Mdc53 PE-2 SV-1               | MDC53_MOUSE      | 49 kDa           | 0        | 0        | 26       | 2.33     | RDV/0 |                                                                                                                | 855 (0.13)                                                                 |
| 38 | 14-3-3 protein-binding protein 2 OS-Mus musculus GN-14332 PE1 SV-2                                 | 14332_MOUSE      | 25 kDa           | 0        | 0        | 25       | 2.73     | RDV/0 |                                                                                                                | 855 (0.16)                                                                 |
| 39 | 14-3-3 protein delta OS-Mus musculus GN-Yahap PE1 SV-2                                             | 14336_MOUSE      | 28 kDa           | 0        | 0        | 24       | 2.73     | RDV/0 |                                                                                                                | 855 (0.12)                                                                 |
| 40 | Hydrolytic-related protein 3 OS-Mus musculus GN-Hwr3 PE1 SV-1                                      | HWY3_MOUSE       | 134 kDa          | 0        | 0        | 245      | 4.22     | RDV/0 | GN-133 binds to TERT and TRF1                                                                                  | Fu, D. Mol Cell (2007) 28, 773-784. Zhu, J. Cell Biol (2008) 185, 827-839. |
| 41 | 14-3-3 protein theta OS-Mus musculus GN-Yahap PE1 SV-1                                             | 14337_MOUSE      | 28 kDa           | 0        | 0        | 24       | 4.16     | RDV/0 | 14-3-3 beta and c bind to TERT                                                                                 | 855 (0.37)                                                                 |
| 42 | Protein W2 OS-Mus musculus GN-W2 PE1 SV-2                                                          | W2_MOUSE         | 184 kDa          | 0        | 0        | 24       | 6.79     | RDV/0 |                                                                                                                | 855 (0.063)                                                                |
| 43 | 14-3-3 protein zeta OS-Mus musculus GN-Yahap PE1 SV-2                                              | 14339_MOUSE      | 28 kDa           | 0        | 0        | 23       | 2.73     | RDV/0 |                                                                                                                | 855 (0.12)                                                                 |
| 44 | Repeat-containing protein 18 OS-Mus musculus GN-Rp18 PE-2 SV-1                                     | ROR18_MOUSE      | 47 kDa           | 0        | 0        | 224      | 2.26     | RDV/0 |                                                                                                                | 855 (0.16)                                                                 |
| 45 | Polynucleotide 5'-hydroxylase NOL3 OS-Mus musculus GN-Nol3 PE-2 SV-1                               | NOL3_MOUSE       | 81 kDa           | 0        | 0        | 22       | 3.81     | RDV/0 |                                                                                                                | 855 (0.37)                                                                 |
| 46 | 40S ribosomal protein S2 OS-Mus musculus GN-Rps2 PE1 SV-1                                          | RPS2_MOUSE       | 25 kDa           | 0        | 0        | 215      | 1.68     | RDV/0 |                                                                                                                | 855 (0.12)                                                                 |
| 47 | Coronin OS-Mus musculus GN-Cor1 PE1 SV-1                                                           | CORN1_MOUSE      | 25 kDa           | 0        | 0        | 212      | 1.84     | RDV/0 |                                                                                                                | 855 (0.37)                                                                 |
| 48 | Rab GDP dissociation inhibitor beta OS-Mus musculus GN-Gdi2 PE1 SV-1                               | GDI2_MOUSE       | 91 kDa           | 0        | 0        | 183      | 3.18     | RDV/0 |                                                                                                                | 855 (0.37)                                                                 |
| 49 | Alpha-acetyltransferase 38, Nacetyl auxiliary subunit OS-Mus musculus GN-Naa38 PE-2 SV-3           | NAA38_MOUSE      | 19 kDa           | 0        | 0        | 183      | 3.18     | RDV/0 |                                                                                                                | 855 (0.37)                                                                 |
| 50 | Receptor-related G2 localization protein OS-Mus musculus GN-Rgl2 PE-2 SV-1                         | RGL2_MOUSE       | 25 kDa           | 0        | 0        | 183      | 3.18     | RDV/0 |                                                                                                                | 855 (0.37)                                                                 |
| 51 | Repeat-containing protein Rap-1A OS-Mus musculus GN-Rap1 PE-2 SV-1                                 | RAP1A_MOUSE      | 21 kDa           | 0        | 0        | 18       | 3.12     | RDV/0 |                                                                                                                | 855 (0.37)                                                                 |
| 52 | 60S ribosomal protein L7-like 1 OS-Mus musculus GN-Rpl71 PE-2 SV-1                                 | RLT1_MOUSE       | 29 kDa           | 0        | 0        | 18       | 1.87     | RDV/0 |                                                                                                                | 855 (0.14)                                                                 |
| 53 | Repeat-containing protein 5 OS-Mus musculus GN-Rp5 PE-2 SV-2                                       | RPL5_MOUSE       | 29 kDa           | 0        | 0        | 175      | 3.04     | RDV/0 |                                                                                                                | 855 (0.37)                                                                 |
| 54 | Proteasome subunit alpha type 1 OS-Mus musculus GN-Panp1 PE1 SV-1                                  | PSA1_MOUSE       | 29 kDa           | 0        | 0        | 175      | 2.43     | RDV/0 |                                                                                                                | 855 (0.13)                                                                 |
| 55 | Guanine nucleotide-binding protein G(i) subunit alpha-2 OS-Mus musculus GN-Gra2 PE1 SV-3           | GNAA2_MOUSE      | 40 kDa           | 0        | 0        | 17       | 1.65     | RDV/0 |                                                                                                                | 855 (0.15)                                                                 |
| 56 | Protein-tyrosine phosphatase SH-PTP2 OS-Mus musculus GN-SHP2 PE1 SV-1                              | SHP2_MOUSE       | 24 kDa           | 0        | 0        | 165      | 1.58     | RDV/0 |                                                                                                                | 855 (0.14)                                                                 |
| 57 | 60S ribosomal protein L23 OS-Mus musculus GN-Rpl23 PE-2 SV-3                                       | RLT23_MOUSE      | 17 kDa           | 0        | 0        | 162      | 1.68     | RDV/0 |                                                                                                                | 855 (0.14)                                                                 |
| 58 | Microgyn-activated protein kinase 14 OS-Mus musculus GN-Mkap14 PE1 SV-1                            | MK14_MOUSE       | 41 kDa           | 0        | 0        | 163      | 1.44     | RDV/0 |                                                                                                                | 855 (0.12)                                                                 |
| 59 | Hormonin OS-Homo sapiens GN-HRHR PE1 SV-2                                                          | HRHR_HUMAN       | 282 kDa          | 0        | 0        | 15       | 2.6      | RDV/0 |                                                                                                                | 855 (0.37)                                                                 |
| 60 | Microgyn-activated protein kinase 1 OS-Mus musculus GN-Mkap1 PE1 SV-3                              | MKI1_MOUSE       | 40 kDa           | 0        | 0        | 15       | 2.6      | RDV/0 |                                                                                                                | 855 (0.37)                                                                 |
| 61 | Actin-related protein 2/2 complex subunit 4 OS-Mus musculus GN-Arp4 PE1 SV-3                       | ARPD4_MOUSE      | 35 kDa           | 0        | 0        | 15       | 2.6      | RDV/0 |                                                                                                                | 855 (0.37)                                                                 |
| 62 | Craniofacial development protein 1 OS-Mus musculus GN-Cfdp1 PE1 SV-1                               | CDFP1_MOUSE      | 33 kDa           | 0        | 0        | 15       | 2.6      | RDV/0 |                                                                                                                | 855 (0.37)                                                                 |
| 63 | Glycylproline-protein kinase CK2 OS-Mus musculus GN-Ck2 PE1 SV-2                                   | CK2K_MOUSE       | 51 kDa           | 0        | 0        | 15       | 2.6      | RDV/0 |                                                                                                                | 855 (0.37)                                                                 |
| 64 | GTP-ubiquitin lyase 4 OS-Mus musculus GN-Ubl4 PE-2 SV-1                                            | UBR4_MOUSE       | 26 kDa           | 0        | 0        | 15       | 2.6      | RDV/0 |                                                                                                                | 855 (0.37)                                                                 |
| 65 | ATP-dependent RNA helicase DDX34 OS-Mus musculus GN-Ddx34 PE1 SV-1                                 | DDX34_MOUSE      | 86 kDa           | 0        | 0        | 14       | 2.43     | RDV/0 |                                                                                                                | 855 (0.37)                                                                 |
| 66 | Repeat-containing protein 5 OS-Mus musculus GN-Rp5 PE1 SV-1                                        | RPS5_MOUSE       | 37 kDa           | 0        | 0        | 14       | 2.43     | RDV/0 |                                                                                                                | 855 (0.37)                                                                 |
| 67 | Mediator of RNA polymerase II transcription subunit 32 OS-Mus musculus GN-Med32 PE-2 SV-1          | MED32_MOUSE      | 44 kDa           | 0        | 0        | 13       | 2.43     | RDV/0 |                                                                                                                | 855 (0.37)                                                                 |
| 68 | KRRI small subunit proteasome component homolog OS-Mus musculus GN-Krri1 PE-2 SV-1                 | KRRI_MOUSE       | 44 kDa           | 0        | 0        | 13       | 1.17     | RDV/0 |                                                                                                                | 855 (0.12)                                                                 |
| 69 | Mdyb SANT-like DNA-binding domain-containing protein 2 OS-Mus musculus GN-Mdyb2 PE1 SV-1           | MSD4_MOUSE       | 0 kDa            | 0        | 0        | 13       | 1.17     | RDV/0 |                                                                                                                | 855 (0.12)                                                                 |
| 70 | Meson OS-Mus musculus GN-Mes PE1 SV-1                                                              | MES_MOUSE        | 88 kDa           | 0        | 0        | 13       | 1.14     | RDV/0 |                                                                                                                | 855 (0.12)                                                                 |
| 71 | Cell division cycle protein 27 homolog OS-Mus musculus GN-Cdc27 PE-2 SV-1                          | CDC27_MOUSE      | 82 kDa           | 0        | 0        | 12       | 2.08     | RDV/0 |                                                                                                                | 855 (0.37)                                                                 |
| 72 | Actin-binding protein anillin OS-Mus musculus GN-Anln PE1 SV-2                                     | ANLN_MOUSE       | 123 kDa          | 0        | 0        | 12       | 2.08     | RDV/0 |                                                                                                                | 855 (0.37)                                                                 |
| 73 | 20S proteasome subunit CT01 OS-Mus musculus GN-Dot1 PE1 SV-2                                       | CT01_MOUSE       | 134 kDa          | 0        | 0        | 12       | 2.08     | RDV/0 |                                                                                                                | 855 (0.37)                                                                 |
| 74 | Adenovirus OS-Mus musculus GN-Ad PE1 SV-1                                                          | ADV_MOUSE        | 181 kDa          | 0        | 0        | 12       | 2.08     | RDV/0 |                                                                                                                | 855 (0.37)                                                                 |
| 75 | Cystine and glycine-rich protein 1 OS-Mus musculus GN-Csrp1 PE1 SV-3                               | CSPR1_MOUSE      | 21 kDa           | 0        | 0        | 12       | 2.08     | RDV/0 |                                                                                                                | 855 (0.37)                                                                 |
| 76 | 40S ribosomal protein S21 OS-Mus musculus GN-Rps21 PE1 SV-1                                        | RPS21_MOUSE      | 9 kDa            | 0        | 0        | 12       | 2.08     | RDV/0 |                                                                                                                | 855 (0.37)                                                                 |
| 77 | Nucleo-delta2-containing protein 2 OS-Mus musculus GN-Nudc2 PE1 SV-1                               | NUDC2_MOUSE      | 18 kDa           | 0        | 0        | 12       | 2.08     | RDV/0 |                                                                                                                | 855 (0.37)                                                                 |
| 78 | Proteinase inhibitor molecule 1 OS-Mus musculus GN-Pi1 PE1 SV-1                                    | PI1_MOUSE        | 85 kDa           | 0        | 0        | 12       | 2.08     | RDV/0 |                                                                                                                | 855 (0.37)                                                                 |
| 79 | Eukaryotic translation initiation factor 4E OS-Mus musculus GN-Eif4e PE1 SV-1                      | EIF4E_MOUSE      | 25 kDa           | 0        | 0        | 12       | 2.08     | RDV/0 |                                                                                                                | 855 (0.37)                                                                 |
| 80 | Nucleosporin SEH1 OS-Mus musculus GN-Seh1 PE-2 SV-1                                                | SEH1_MOUSE       | 40 kDa           | 0        | 0        | 11       | 1.91     | RDV/0 |                                                                                                                | 855 (0.37)                                                                 |
| 81 | Nuclear import protein Nup1 OS-Mus musculus GN-Nup1 PE1 SV-1                                       | NUP1_MOUSE       | 80 kDa           | 0        | 0        | 11       | 1.91     | RDV/0 |                                                                                                                | 855 (0.37)                                                                 |
| 82 | Ubiquitin-conjugating enzyme E2 N OS-Mus musculus GN-Ubcn2 PE1 SV-1                                | UBCN2_MOUSE      | 17 kDa           | 0        | 0        | 11       | 1.91     | RDV/0 |                                                                                                                | 855 (0.37)                                                                 |
| 83 | Calycin-binding protein OS-Mus musculus GN-Calybp PE1 SV-1                                         | CYPBP_MOUSE      | 27 kDa           | 0        | 0        | 10       | 1.82     | RDV/0 |                                                                                                                | 855 (0.37)                                                                 |
| 84 | Protein quaking OS-Mus musculus GN-Qk PE1 SV-1                                                     | QK_MOUSE         | 28 kDa           | 0        | 0        | 10       | 1.82     | RDV/0 |                                                                                                                | 855 (0.37)                                                                 |
| 85 | Proteinase RNA-binding protein 3 OS-Mus musculus GN-Rbp3 PE1 SV-1                                  | RBP3_MOUSE       | 85 kDa           | 0        | 0        | 10       | 1.82     | RDV/0 |                                                                                                                | 855 (0.37)                                                                 |
| 86 | Sarasin/arginine-rich spacing factor 8 OS-Mus musculus GN-Srpf PE1 SV-1                            | SRSF9_MOUSE      | 28 kDa           | 0        | 0        | 10       | 1.82     | RDV/0 |                                                                                                                | 855 (0.37)                                                                 |
| 87 | CLUJ mouse                                                                                         | CLUJ_MOUSE       | 9 kDa            | 0        | 0        | 10       | 1.82     | RDV/0 |                                                                                                                | 855 (0.37)                                                                 |
| 88 | Histone acetyltransferase type C catalytic subunit OS-Mus musculus GN-Hac1 PE-2 SV-1               | HAT1_MOUSE       | 18 kDa           | 0        | 0        | 10       | 1.82     | RDV/0 | HAT1 is required for telomeric silencing in S. pombe                                                           | Teng, Eukaryotic Cell (2000) 11, 1085-1103.                                |
| 89 | RNA-binding protein with multiple spacing 2 OS-Mus musculus GN-Rbm2 PE1 SV-1                       | RBP22_MOUSE      | 22 kDa           | 0        | 0        | 10       | 1.82     | RDV/0 |                                                                                                                | 855 (0.37)                                                                 |
| 90 | Protein polybromin OS-Mus musculus GN-Ppb1 PE1 SV-4                                                | PPI1_MOUSE       | 187 kDa          | 0        | 0        | 9        | 1.56     | RDV/0 |                                                                                                                | 855 (0.37)                                                                 |
| 91 | Transmembrane phosphatase non-receptor type 2 OS-Mus musculus GN-Ptpn2 PE-2 SV-2                   | PTPN2_MOUSE      | 42 kDa           | 0        | 0        | 9        | 1.56     | RDV/0 |                                                                                                                | 855 (0.37)                                                                 |
| 92 | Cadherin heavy chain 1 OS-Mus musculus GN-Cdha PE1 SV-3                                            | CLUJ_MOUSE       | 192 kDa          | 0        | 0        | 9        | 1.56     | RDV/0 |                                                                                                                | 855 (0.37)                                                                 |
| 93 | Hemoglobin protein cut-like 1 OS-Mus musculus GN-Cutl1 PE1 SV-3                                    | CLU1_MOUSE       | 166 kDa          | 0        | 0        | 9        | 1.56     | RDV/0 |                                                                                                                | 855 (0.37)                                                                 |
| 94 | Cadherin interactor 1 OS-Mus musculus GN-Cid1 PE1 SV-2                                             | EPHA_MOUSE       | 69 kDa           | 0        | 0        | 9        | 1.56     | RDV/0 |                                                                                                                | 855 (0.37)                                                                 |
| 95 | Diphthaloyl reductase hydrolytic component OS-Mus musculus GN-D                                    |                  |                  |          |          |          |          |       |                                                                                                                |                                                                            |

| Accession | Gene Name                                                                           | Protein Name                        | Length       | Start   | End  | Score | Model | Notes |
|-----------|-------------------------------------------------------------------------------------|-------------------------------------|--------------|---------|------|-------|-------|-------|
| 142       | U1 small nuclear ribonucleoprotein 40 kDa subunit                                   | OS-Mus musculus GN-Smp40 PE-2 SV-1  | SNR40 MOUSE  | 39 kDa  | 0    | 0     | 0.6   | 1.04  |
| 143       | TBR1 basal transcription factor complex helixase XRB subunit                        | OS-Mus musculus GN-Ecc3 PE-2 SV-1   | ERCC3 MOUSE  | 39 kDa  | 0    | 0     | 0.6   | 1.04  |
| 144       | DNA polymerase delta subunit                                                        | OS-Mus musculus GN-Pol31 PE-2 SV-1  | PCNA MOUSE   | 39 kDa  | 0    | 0     | 0.6   | 1.04  |
| 145       | Proteasome-associated protein E2C3                                                  | OS-Mus musculus GN-E2c3 PE-1 SV-3   | ECM29 MOUSE  | 30 kDa  | 0    | 0     | 0.6   | 1.04  |
| 146       | Eyad absent homolog 3                                                               | OS-Mus musculus GN-Eyad3 PE-1 SV-1  | EYAD3 MOUSE  | 36 kDa  | 0    | 0     | 0.6   | 1.04  |
| 147       | Substrate for transcription factor 4                                                | OS-Mus musculus GN-SubT4 PE-1 SV-2  | TF4 MOUSE    | 32 kDa  | 0    | 0     | 0.6   | 1.04  |
| 148       | Perlecan-2                                                                          | OS-Mus musculus GN-Per2 PE-1 SV-3   | PRDX2 MOUSE  | 32 kDa  | 0    | 0     | 0.6   | 1.04  |
| 149       | Ribose-phosphate pyrophosphatase 1                                                  | OS-Mus musculus GN-RpP1 PE-1 SV-4   | RRP1 MOUSE   | 35 kDa  | 0    | 0     | 0.6   | 1.04  |
| 150       | Septin-3                                                                            | OS-Mus musculus GN-Sept3 PE-1 SV-2  | SEPT3 MOUSE  | 42 kDa  | 0    | 0     | 0.6   | 1.04  |
| 151       | Nucleobindin 1TR                                                                    | OS-Mus musculus GN-Nb1 PE-1 SV-3    | NB1 MOUSE    | 37 kDa  | 0    | 0     | 0.6   | 1.04  |
| 152       | Ubiquitin carboxyl-terminal hydrolase 14                                            | OS-Mus musculus GN-Ubl14 PE-1 SV-3  | UBR14 MOUSE  | 36 kDa  | 0    | 0     | 0.6   | 1.04  |
| 153       | Indinavir 5'-monophosphate synthase                                                 | OS-Mus musculus GN-Indp5 PE-2 SV-1  | UMPS MOUSE   | 32 kDa  | 0    | 0     | 0.6   | 1.04  |
| 154       | HD mouse containing protein 81                                                      | OS-Mus musculus GN-Hd81 PE-2 SV-1   | HD81 MOUSE   | 24 kDa  | 0    | 0     | 0.6   | 1.04  |
| 155       | Zinc finger protein 254D                                                            | OS-Mus musculus GN-Zf254d PE-2 SV-2 | ZF254D MOUSE | 146 kDa | 0    | 0     | 0.6   | 1.04  |
| 156       | Ribonuclease inhibitor                                                              | OS-Mus musculus GN-Rh1 PE-1 SV-1    | RH1 MOUSE    | 50 kDa  | 1.32 | 2.29  | 20.68 | 3.76  |
| 157       | Protein phosphatase 10                                                              | OS-Mus musculus GN-Ppp10 PE-2 SV-1  | PPP10C MOUSE | 50 kDa  | 1.04 | 1.81  | 9.10  | 6.89  |
| 158       | Pre-mRNA-splicing factor 5V1                                                        | OS-Mus musculus GN-Pre5V1 PE-2 SV-1 | SVF1 MOUSE   | 100 kDa | 0.69 | 1.2   | 3.39  | 0.96  |
| 159       | UDP-N-acetylglucosamine-6-phosphate N-acetylglucosaminyltransferase 110 kDa subunit | OS-Mus musculus GN-Ugt11            | UGT11 MOUSE  | 117 kDa | 0.63 | 1.09  | 4.67  | 0.65  |
| 160       | DnaJ homolog subfamily A member 2                                                   | OS-Mus musculus GN-Dnaj2 PE-1 SV-1  | DNAJ2 MOUSE  | 48 kDa  | 0.69 | 1.12  | 5.07  | 1.07  |
| 161       | DNA-binding protein 518                                                             | OS-Mus musculus GN-Dbp518 PE-1 SV-2 | DBP518 MOUSE | 27 kDa  | 0.69 | 1.2   | 2.82  | 6.88  |
| 162       | Ubiquitin carboxyl-terminal hydrolase 5                                             | OS-Mus musculus GN-Ubl5 PE-1 SV-1   | UBR5 MOUSE   | 36 kDa  | 0.69 | 1.2   | 4.71  | 5.35  |
| 163       | Aldehyde reductase                                                                  | OS-Mus musculus GN-AldR PE-1 SV-3   | ALDR MOUSE   | 36 kDa  | 1.04 | 1.81  | 6.37  | 1.89  |
| 164       | Nucleoside acetyltransferase                                                        | OS-Mus musculus GN-NAc1 PE-2 SV-1   | NAC1 MOUSE   | 37 kDa  | 3.06 | 3.79  | 18.3  | 11.03 |
| 165       | 4-oxymethylglutathione hydrolase                                                    | OS-Mus musculus GN-OxM1 PE-2 SV-1   | OXM1 MOUSE   | 37 kDa  | 0.69 | 1.2   | 4.08  | 1.25  |
| 166       | Proteasome activator complex subunit 3                                              | OS-Mus musculus GN-Pam3 PE-1 SV-1   | PSME3 MOUSE  | 30 kDa  | 0.69 | 1.2   | 3.99  | 1.26  |
| 167       | DNA polymerase epsilon catalytic subunit A                                          | OS-Mus musculus GN-Pol32 PE-2 SV-1  | DPE1 MOUSE   | 202 kDa | 0.69 | 1.12  | 3.85  | 0.95  |
| 168       | HD mouse and HD mouse containing protein 105                                        | OS-Mus musculus GN-Hd105 PE-2 SV-2  | HD105 MOUSE  | 254 kDa | 0.69 | 1.2   | 28.13 | 19.22 |
| 169       | RNA-splicing factor Rb1                                                             | OS-Mus musculus GN-Rb1 PE-2 SV-1    | RFB1 MOUSE   | 35 kDa  | 0.63 | 1.09  | 3.2   | 3.16  |
| 170       | Low molecular weight phosphotyrosine phosphatase                                    | OS-Mus musculus GN-Asp1 PE-1 SV-3   | PPAC MOUSE   | 18 kDa  | 0.69 | 1.12  | 3.29  | 1.16  |
| 171       | Microtubulin-like protein 1                                                         | OS-Mus musculus GN-Mtl1 PE-1 SV-2   | MTL1 MOUSE   | 16 kDa  | 0.69 | 1.2   | 2.88  | 0.78  |
| 172       | Cell division cycle protein 16                                                      | OS-Mus musculus GN-Cdc16 PE-2 SV-1  | CDCE16 MOUSE | 71 kDa  | 0.63 | 1.09  | 2.97  | 4.71  |
| 173       | Talin-1                                                                             | OS-Mus musculus GN-Tal1 PE-1 SV-2   | TLN1 MOUSE   | 270 kDa | 8.8  | 4.79  | 37.77 | 9.97  |
| 174       | Hemoglobin beta-2                                                                   | OS-Mus musculus GN-Hb2 PE-1 SV-2    | HBB2 MOUSE   | 16 kDa  | 0.63 | 1.09  | 2.6   | 2.33  |
| 175       | Zinc finger MYM-type protein 4                                                      | OS-Mus musculus GN-Zfmy4 PE-1 SV-1  | ZFMY4 MOUSE  | 123 kDa | 0.69 | 1.2   | 12.4  | 4.04  |
| 176       | CluBP1 E3a-like family member 2                                                     | OS-Mus musculus GN-CluBP1 PE-1 SV-1 | CLU2 MOUSE   | 34 kDa  | 2.68 | 1.29  | 10.54 | 3.63  |
| 177       | Thioredoxin-like protein 1                                                          | OS-Mus musculus GN-Thrx1 PE-1 SV-3  | TXNL1 MOUSE  | 32 kDa  | 0.69 | 1.71  | 3.8   | 4.06  |
| 178       | Nucleoside pyrophosphatase 1                                                        | OS-Mus musculus GN-Npp1 PE-1 SV-2   | NPP1 MOUSE   | 37 kDa  | 0.69 | 1.74  | 3.91  | 3.76  |
| 179       | Actin-like protein 6A                                                               | OS-Mus musculus GN-Act6A PE-1 SV-2  | ACT6A MOUSE  | 47 kDa  | 0.63 | 1.09  | 2.37  | 2.22  |
| 180       | Galectinase                                                                         | OS-Mus musculus GN-Gal1 PE-2 SV-1   | GAL1 MOUSE   | 47 kDa  | 2.99 | 1.11  | 11.1  | 2.45  |
| 181       | Ubiquitin-protein ligase BRE1A                                                      | OS-Mus musculus GN-Bre1A PE-2 SV-2  | BRE1A MOUSE  | 114 kDa | 2.06 | 2.81  | 7.18  | 3.71  |
| 182       | ADP-ribosylation factor 1                                                           | OS-Mus musculus GN-Arf1 PE-1 SV-2   | ARF1 MOUSE   | 17 kDa  | 1.2  | 2.18  | 4.07  | 4.1   |
| 183       | Acidic leucine-rich nuclear phosphoprotein 32 family member B                       | OS-Mus musculus GN-Anr32b PE-1 SV-1 | ANR32B MOUSE | 31 kDa  | 1.13 | 2.42  | 10.62 | 3.5   |
| 184       | Galectin-9                                                                          | OS-Mus musculus GN-Gal9 PE-1 SV-1   | LEG9 MOUSE   | 40 kDa  | 2.58 | 2.48  | 9.02  | 3.48  |
| 185       | Transcriptional activator 1                                                         | OS-Mus musculus GN-Tact1 PE-1 SV-2  | TACT1 MOUSE  | 48 kDa  | 0.69 | 1.2   | 2.4   | 0.41  |
| 186       | E3 ubiquitin-protein ligase UBR5                                                    | OS-Mus musculus GN-Ubr5 PE-2 SV-2   | UBR5 MOUSE   | 309 kDa | 0.54 | 1.53  | 32.7  | 2.88  |
| 187       | Malate dehydrogenase, cytoplasmic                                                   | OS-Mus musculus GN-Mdh1 PE-1 SV-3   | MDHC1 MOUSE  | 37 kDa  | 0.99 | 1.71  | 3.4   | 4.21  |
| 188       | Caprin heavy chain 1                                                                | OS-Mus musculus GN-Cap1 PE-1 SV-3   | CSH1 MOUSE   | 91 kDa  | 2.56 | 2.24  | 8.13  | 7.9   |
| 189       | Caspase-3                                                                           | OS-Mus musculus GN-Casp3 PE-1 SV-1  | CASP3 MOUSE  | 31 kDa  | 1.2  | 2.39  | 7.38  | 0.86  |
| 190       | SMN2 complex subunit SMN2C1                                                         | OS-Mus musculus GN-Smn2c1 PE-1 SV-2 | SMN2C1 MOUSE | 123 kDa | 0.63 | 1.09  | 1.53  | 3.33  |
| 191       | Isopentenyl transferase 1                                                           | OS-Mus musculus GN-Isot1 PE-1 SV-2  | ISOT1 MOUSE  | 37 kDa  | 4.58 | 1.85  | 14.6  | 5.88  |
| 192       | Chaperonin stimulation factor 1                                                     | OS-Mus musculus GN-Chatf1 PE-1 SV-1 | CHATF1 MOUSE | 12 kDa  | 0.69 | 1.12  | 3.21  | 3.16  |
| 193       | Chromodomain-helicase-DNA-binding protein 8                                         | OS-Mus musculus GN-Chb1 PE-1 SV-1   | CHB1 MOUSE   | 29 kDa  | 1.04 | 1.81  | 3.34  | 2.93  |
| 194       | Aldehyde reductase family 1 member C13                                              | OS-Mus musculus GN-Aldr13 PE-1 SV-2 | ALDR13 MOUSE | 37 kDa  | 8.17 | 2.76  | 25.19 | 13.69 |
| 195       | Apoptosis-promoting complex 4                                                       | OS-Mus musculus GN-Apoc4 PE-2 SV-1  | APCA4 MOUSE  | 62 kDa  | 0.63 | 1.09  | 1.83  | 1.81  |
| 196       | Myelin expression factor 2                                                          | OS-Mus musculus GN-Myef2 PE-1 SV-1  | MYEF2 MOUSE  | 32 kDa  | 1.39 | 2.41  | 6.25  | 4.8   |
| 197       | Caprin-2                                                                            | OS-Mus musculus GN-Cap2 PE-2 SV-1   | MDHC2 MOUSE  | 37 kDa  | 0.99 | 1.71  | 3.4   | 4.21  |
| 198       | Caprin-1                                                                            | OS-Mus musculus GN-Cap1 PE-2 SV-1   | MDHC1 MOUSE  | 37 kDa  | 0.99 | 1.71  | 3.4   | 4.21  |
| 199       | Caprin-3                                                                            | OS-Mus musculus GN-Cap3 PE-2 SV-1   | MDHC3 MOUSE  | 37 kDa  | 0.99 | 1.71  | 3.4   | 4.21  |
| 200       | Caprin-4                                                                            | OS-Mus musculus GN-Cap4 PE-2 SV-1   | MDHC4 MOUSE  | 37 kDa  | 0.99 | 1.71  | 3.4   | 4.21  |
| 201       | Caprin-5                                                                            | OS-Mus musculus GN-Cap5 PE-2 SV-1   | MDHC5 MOUSE  | 37 kDa  | 0.99 | 1.71  | 3.4   | 4.21  |
| 202       | Caprin-6                                                                            | OS-Mus musculus GN-Cap6 PE-2 SV-1   | MDHC6 MOUSE  | 37 kDa  | 0.99 | 1.71  | 3.4   | 4.21  |
| 203       | Caprin-7                                                                            | OS-Mus musculus GN-Cap7 PE-2 SV-1   | MDHC7 MOUSE  | 37 kDa  | 0.99 | 1.71  | 3.4   | 4.21  |
| 204       | Caprin-8                                                                            | OS-Mus musculus GN-Cap8 PE-2 SV-1   | MDHC8 MOUSE  | 37 kDa  | 0.99 | 1.71  | 3.4   | 4.21  |
| 205       | Caprin-9                                                                            | OS-Mus musculus GN-Cap9 PE-2 SV-1   | MDHC9 MOUSE  | 37 kDa  | 0.99 | 1.71  | 3.4   | 4.21  |
| 206       | Caprin-10                                                                           | OS-Mus musculus GN-Cap10 PE-2 SV-1  | MDHC10 MOUSE | 37 kDa  | 0.99 | 1.71  | 3.4   | 4.21  |
| 207       | Caprin-11                                                                           | OS-Mus musculus GN-Cap11 PE-2 SV-1  | MDHC11 MOUSE | 37 kDa  | 0.99 | 1.71  | 3.4   | 4.21  |
| 208       | Caprin-12                                                                           | OS-Mus musculus GN-Cap12 PE-2 SV-1  | MDHC12 MOUSE | 37 kDa  | 0.99 | 1.71  | 3.4   | 4.21  |
| 209       | Caprin-13                                                                           | OS-Mus musculus GN-Cap13 PE-2 SV-1  | MDHC13 MOUSE | 37 kDa  | 0.99 | 1.71  | 3.4   | 4.21  |
| 210       | Caprin-14                                                                           | OS-Mus musculus GN-Cap14 PE-2 SV-1  | MDHC14 MOUSE | 37 kDa  | 0.99 | 1.71  | 3.4   | 4.21  |
| 211       | Caprin-15                                                                           | OS-Mus musculus GN-Cap15 PE-2 SV-1  | MDHC15 MOUSE | 37 kDa  | 0.99 | 1.71  | 3.4   | 4.21  |
| 212       | Caprin-16                                                                           | OS-Mus musculus GN-Cap16 PE-2 SV-1  | MDHC16 MOUSE | 37 kDa  | 0.99 | 1.71  | 3.4   | 4.21  |
| 213       | Caprin-17                                                                           | OS-Mus musculus GN-Cap17 PE-2 SV-1  | MDHC17 MOUSE | 37 kDa  | 0.99 | 1.71  | 3.4   | 4.21  |
| 214       | Caprin-18                                                                           | OS-Mus musculus GN-Cap18 PE-2 SV-1  | MDHC18 MOUSE | 37 kDa  | 0.99 | 1.71  | 3.4   | 4.21  |
| 215       | Caprin-19                                                                           | OS-Mus musculus GN-Cap19 PE-2 SV-1  | MDHC19 MOUSE | 37 kDa  | 0.99 | 1.71  | 3.4   | 4.21  |
| 216       | Caprin-20                                                                           | OS-Mus musculus GN-Cap20 PE-2 SV-1  | MDHC20 MOUSE | 37 kDa  | 0.99 | 1.71  | 3.4   | 4.21  |
| 217       | Caprin-21                                                                           | OS-Mus musculus GN-Cap21 PE-2 SV-1  | MDHC21 MOUSE | 37 kDa  | 0.99 | 1.71  | 3.4   | 4.21  |
| 218       | Caprin-22                                                                           | OS-Mus musculus GN-Cap22 PE-2 SV-1  | MDHC22 MOUSE | 37 kDa  | 0.99 | 1.71  | 3.4   | 4.21  |
| 219       | Caprin-23                                                                           | OS-Mus musculus GN-Cap23 PE-2 SV-1  | MDHC23 MOUSE | 37 kDa  | 0.99 | 1.71  | 3.4   | 4.21  |
| 220       | Caprin-24                                                                           | OS-Mus musculus GN-Cap24 PE-2 SV-1  | MDHC24 MOUSE | 37 kDa  | 0.99 | 1.71  | 3.4   | 4.21  |
| 221       | Caprin-25                                                                           | OS-Mus musculus GN-Cap25 PE-2 SV-1  | MDHC25 MOUSE | 37 kDa  | 0.99 | 1.71  | 3.4   | 4.21  |
| 222       | Caprin-26                                                                           | OS-Mus musculus GN-Cap26 PE-2 SV-1  | MDHC26 MOUSE | 37 kDa  | 0.99 | 1.71  | 3.4   | 4.21  |
| 223       | Caprin-27                                                                           | OS-Mus musculus GN-Cap27 PE-2 SV-1  | MDHC27 MOUSE | 37 kDa  | 0.99 | 1.71  | 3.4   | 4.21  |
| 224       | Caprin-28                                                                           | OS-Mus musculus GN-Cap28 PE-2 SV-1  | MDHC28 MOUSE | 37 kDa  | 0.99 | 1.71  | 3.4   | 4.21  |
| 225       | Caprin-29                                                                           | OS-Mus musculus GN-Cap29 PE-2 SV-1  | MDHC29 MOUSE | 37 kDa  | 0.99 | 1.71  | 3.4   | 4.21  |
| 226       | Caprin-30                                                                           | OS-Mus musculus GN-Cap30 PE-2 SV-1  | MDHC30 MOUSE | 37 kDa  | 0.99 | 1.71  | 3.4   | 4.21  |
| 227       | Caprin-31                                                                           | OS-Mus musculus GN-Cap31 PE-2 SV-1  | MDHC31 MOUSE | 37 kDa  | 0.99 | 1.71  | 3.4   | 4.21  |
| 228       | Caprin-32                                                                           | OS-Mus musculus GN-Cap32 PE-2 SV-1  | MDHC32 MOUSE | 37 kDa  | 0.99 | 1.71  | 3.4   | 4.21  |
| 229       | Caprin-33                                                                           | OS-Mus musculus GN-Cap33 PE-2 SV-1  | MDHC33 MOUSE | 37 kDa  | 0.99 | 1.71  | 3.4   | 4.21  |
| 230       | Caprin-34                                                                           | OS-Mus musculus GN-Cap34 PE-2 SV-1  | MDHC34 MOUSE | 37 kDa  | 0.99 | 1.71  | 3.4   | 4.21  |
| 231       | Caprin-35                                                                           | OS-Mus musculus GN-Cap35 PE-2 SV-1  | MDHC35 MOUSE | 37 kDa  | 0.99 | 1.71  | 3.4   | 4.21  |
| 232       | Caprin-36                                                                           | OS-Mus musculus GN-Cap36 PE-2 SV-1  | MDHC36 MOUSE | 37 kDa  | 0.99 | 1.71  | 3.4   | 4.21  |
| 233       | Caprin-37                                                                           | OS-Mus musculus GN-Cap37 PE-2 SV-1  | MDHC37 MOUSE | 37 kDa  | 0.99 | 1.71  | 3.4   | 4.21  |
| 234       | Caprin-38                                                                           | OS-Mus musculus GN-Cap38 PE-2 SV-1  | MDHC38 MOUSE | 37 kDa  | 0.99 | 1.71  | 3.4   | 4.21  |
| 235       | Caprin-39                                                                           | OS-Mus musculus GN-Cap39 PE-2 SV-1  | MDHC39 MOUSE | 37 kDa  | 0.99 | 1.71  | 3.4   | 4.21  |
| 236       | Caprin-40                                                                           | OS-Mus musculus GN-Cap40 PE-2 SV-1  | MDHC40 MOUSE | 37 kDa  | 0.99 | 1.71  | 3.4   | 4.21  |
| 237       | Caprin-41                                                                           | OS-Mus musculus GN-Cap41 PE-2 SV-1  | MDHC41 MOUSE | 37 kDa  | 0.99 | 1.71  | 3.4   | 4.21  |
| 238       | Caprin-42                                                                           | OS-Mus musculus GN-Cap42 PE-2 SV-1  | MDHC42 MOUSE | 37 kDa  | 0.99 | 1.71  | 3.4   | 4.21  |
| 239       | Caprin-43                                                                           | OS-Mus musculus GN-Cap43 PE-2 SV-1  | MDHC43 MOUSE | 37 kDa  | 0.99 | 1.71  | 3.4   | 4.21  |
| 240       | Caprin-44                                                                           | OS-Mus musculus GN-Cap44 PE-2 SV-1  | MDHC44 MOUSE | 37 kDa  | 0.99 | 1.71  | 3.4   | 4.21  |
| 241       | Caprin-45                                                                           | OS-Mus musculus GN-Cap45 PE-2 SV-1  | MDHC45 MOUSE | 37 kDa  | 0.99 | 1.71  | 3.4   | 4.21  |
| 242       | Caprin-46                                                                           | OS-Mus musculus GN-Cap46 PE-2 SV-1  | MDHC46 MOUSE | 37 kDa  | 0.99 | 1.71  | 3.4   | 4.21  |
| 243       | Caprin-47                                                                           | OS-Mus musculus GN-Cap47 PE-2 SV-1  | MDHC47 MOUSE | 37 kDa  | 0.99 | 1.71  | 3.4   | 4.21  |
| 244       | Caprin-48                                                                           | OS-Mus musculus GN-Cap48 PE-2 SV-1  | MDHC48 MOUSE | 37 kDa  | 0.99 | 1.71  | 3.4   | 4.21  |
| 245       | Caprin-49                                                                           | OS-Mus musculus GN-Cap49 PE-2 SV-1  | MDHC49 MOUSE | 37 kDa  | 0.99 | 1.71  | 3.4   | 4.21  |
| 246       | Caprin-50                                                                           | OS-Mus musculus GN-Cap50 PE-2 SV-1  | MDHC50 MOUSE | 37 kDa  | 0.99 | 1.71  | 3.4   | 4.21  |
| 247       | Caprin-51                                                                           | OS-Mus musculus GN-Cap51 PE-2 SV-1  | MDHC51 MOUSE | 37 kDa  | 0.99 | 1.71  | 3.4   | 4.21  |
| 248       | Caprin-52                                                                           | OS-Mus musculus GN-Cap52 PE-2 SV-1  | MDHC52 MOUSE | 37 kDa  | 0.99 | 1.71  | 3.4   | 4.21  |
| 249       | Caprin-53                                                                           | OS-Mus musculus GN-Cap53 PE-2 SV-1  | MDHC53 MOUSE | 37 kDa  | 0.99 | 1.71  | 3.4   | 4.21  |
| 250       | Caprin-54                                                                           | OS-Mus musculus GN-Cap54 PE-2 SV-1  | MDHC54 MOUSE | 37 kDa  | 0.99 | 1.71  | 3.4   | 4.21  |
| 251       | Caprin-55                                                                           | OS-Mus musculus GN-Cap55 PE-2 SV-1  | MDHC55 MOUSE | 37 kDa  | 0.99 | 1.71  | 3.4   | 4.21  |
| 252       | Caprin-56                                                                           | OS-Mus musculus GN-Cap56 PE-2 SV-1  | MDHC56 MOUSE | 37 kDa  | 0.99 | 1.71  | 3.4   | 4.21  |
| 253       | Caprin-57                                                                           | OS-Mus musculus GN-Cap57 PE-2 SV-1  | MDHC57 MOUSE | 37 kDa  | 0.99 | 1.71  | 3.4   |       |



|     |                                                            |             |            |     |      |     |         |         |         |       |       |        |       |       |  |                                                                                                                                                  |
|-----|------------------------------------------------------------|-------------|------------|-----|------|-----|---------|---------|---------|-------|-------|--------|-------|-------|--|--------------------------------------------------------------------------------------------------------------------------------------------------|
| 289 | Glyceroldehyde-3-phosphate dehydrogenase                   | OS-Musculus | GN-Gapdh   | PE1 | SV-2 | 63P | MOUSE   | 36 kDa  | 56.41   | 21.13 | 85.01 | 44.55  | 10.31 |       |  |                                                                                                                                                  |
| 290 | Platanin RNA-binding protein 2                             | OS-Musculus | GN-Rbm2    | PE1 | SV1  | 17  | BM1     | MOUSE   | 17 kDa  | 2.91  | 29.68 | 4.37   | 3.95  | 1.5   |  | 06.02.15                                                                                                                                         |
| 291 | Selenin factor 1                                           | OS-Musculus | GN-Sf1     | PE1 | SV-8 | 10  | SF1     | MOUSE   | 70 kDa  | 8.62  | 2.11  | 9.91   | 2.71  | 10.17 |  | 05.01.10                                                                                                                                         |
| 292 | Serine/threonine-protein phosphatase PP1- $\beta$          | OS-Musculus | GN-Ppp1a   | PE1 | SV1  | 38  | MOUSE   | 38 kDa  | 8.53    | 18.40 | 12.74 | 3.76   | 1.49  |       |  | 05.01.10                                                                                                                                         |
| 293 | Matrin-3                                                   | OS-Musculus | GN-Matr3   | PE1 | SV1  | 11  | MATR3   | MOUSE   | 66 kDa  | 52.24 | 24.49 | 17.79  | 33.22 | 1.49  |  | 05.03.14                                                                                                                                         |
| 294 | Heterogeneous nuclear ribonucleoprotein A1                 | OS-Musculus | GN-Hnrapa1 | PE1 | SV1  | 11  | HNRPA1  | MOUSE   | 120 kDa | 1.44  | 2.75  | 1.44   | 1.44  | 1.44  |  | 05.03.10                                                                                                                                         |
| 295 | RuvB-like 1                                                | OS-Musculus | GN-Ruvbl1  | PE1 | SV1  | 11  | RUVB1   | MOUSE   | 50 kDa  | 19.38 | 12.97 | 28.75  | 13.56 | 1.48  |  | 05.04.10                                                                                                                                         |
| 296 | Phosphoglucomutase dehydrogenase                           | OS-Musculus | GN-Pgd     | PE2 | SV-3 | 11  | PGD     | MOUSE   | 53 kDa  | 8.27  | 15.25 | 12.18  | 2.99  | 1.47  |  | 05.05.10                                                                                                                                         |
| 297 | ATP-dependent RNA helicase DDX33                           | OS-Musculus | GN-Ddx33   | PE1 | SV1  | 11  | DDX33   | MOUSE   | 72 kDa  | 14.61 | 5.4   | 21.53  | 11.41 | 1.47  |  | 05.06.10                                                                                                                                         |
| 298 | Nucleolar GTP-binding protein 2                            | OS-Musculus | GN-Nobp2   | PE2 | SV-2 | 11  | NNOB2   | MOUSE   | 15 kDa  | 13.29 | 1.47  | 1.47   | 1.47  | 1.47  |  | 05.06.10                                                                                                                                         |
| 299 | Protein strawberry notch homolog 1                         | OS-Musculus | GN-Sbn1    | PE1 | SV-2 | 11  | SBN1    | MOUSE   | 154 kDa | 4.97  | 1.09  | 7.28   | 2.69  | 1.47  |  | 05.06.10                                                                                                                                         |
| 300 | Alpha-enolase                                              | OS-Musculus | GN-Eno1    | PE1 | SV-2 | 11  | ENO1    | MOUSE   | 47 kDa  | 27.41 | 8.34  | 40.04  | 19.57 | 1.46  |  | 05.06.10                                                                                                                                         |
| 301 | Epitranscriptome translation initiation factor 2 subunit 1 | OS-Musculus | GN-Eif2k1  | PE1 | SV-3 | 11  | EIF2K1  | MOUSE   | 25 kDa  | 1.26  | 2.10  | 1.51   | 3.16  | 1.46  |  | 05.08.11                                                                                                                                         |
| 302 | U4-L5 small nuclear ribonucleoprotein P301                 | OS-Musculus | GN-P301    | PE1 | SV-3 | 11  | P301    | MOUSE   | 35 kDa  | 6.15  | 3.74  | 8.3    | 3.74  | 1.45  |  | 05.08.11                                                                                                                                         |
| 303 | Cleavage and polyadenylation specificity factor subunit 1  | OS-Musculus | GN-Cpsf1   | PE1 | SV1  | 11  | CPSF1   | MOUSE   | 161 kDa | 6.91  | 0.85  | 9.84   | 4.32  | 1.44  |  | 05.08.11                                                                                                                                         |
| 304 | Resolipin protein A 7B                                     | OS-Musculus | GN-Rha1    | PE2 | SV-1 | 11  | RHA1    | MOUSE   | 48 kDa  | 11.22 | 6.20  | 10.88  | 6.55  | 1.43  |  | 05.08.11                                                                                                                                         |
| 305 | Interleukin enhancer-binding factor 2                      | OS-Musculus | GN-Ifi202  | PE1 | SV1  | 11  | IFI202  | MOUSE   | 43 kDa  | 4.33  | 1.71  | 6.2    | 2.43  | 1.43  |  | 05.08.11                                                                                                                                         |
| 306 | Phospholipase A-2-activating protein                       | OS-Musculus | GN-Pla2    | PE2 | SV-4 | 11  | PLA2    | MOUSE   | 87 kDa  | 3.22  | 2.79  | 4.8    | 4     | 1.43  |  | 05.08.11                                                                                                                                         |
| 307 | Polykinesin tract-binding protein 1                        | OS-Musculus | GN-Pktb1   | PE1 | SV-2 | 11  | PKTB1   | MOUSE   | 58 kDa  | 29.99 | 11.84 | 56.66  | 1.5   | 1.42  |  | 05.07.10                                                                                                                                         |
| 308 | RNA-binding protein 27                                     | OS-Musculus | GN-Rbp27   | PE2 | SV-2 | 11  | RBP27   | MOUSE   | 118 kDa | 3.25  | 1.75  | 7.5    | 2.07  | 1.41  |  | 05.07.10                                                                                                                                         |
| 309 | U3 small nucleolar RNA-interacting protein 2               | OS-Musculus | GN-Ubrp1   | PE1 | SV1  | 11  | UBRP1   | MOUSE   | 52 kDa  | 2.03  | 1.65  | 2.66   | 2.66  | 1.41  |  | 05.08.11                                                                                                                                         |
| 310 | Cellular nucleic acid-binding protein                      | OS-Musculus | GN-Cnbp    | PE2 | SV-2 | 11  | CNBP    | MOUSE   | 20 kDa  | 1.62  | 1.5   | 2.24   | 2.26  | 1.38  |  | 05.07.11                                                                                                                                         |
| 311 | DAC-associated protein 1                                   | OS-Musculus | GN-Dap1    | PE2 | SV-2 | 11  | DAP1    | MOUSE   | 43 kDa  | 3.68  | 3.24  | 5.81   | 4.69  | 1.38  |  | 05.08.11                                                                                                                                         |
| 312 | Heterogeneous nuclear ribonucleoprotein F                  | OS-Musculus | GN-Hnrfp   | PE1 | SV-3 | 11  | HNRPF   | MOUSE   | 45 kDa  | 51.23 | 14.42 | 70.25  | 18.83 | 1.37  |  | 05.08.11                                                                                                                                         |
| 313 | U2 small nuclear ribonucleoprotein E                       | OS-Musculus | GN-Snrp2   | PE2 | SV-1 | 11  | RUB     | MOUSE   | 25 kDa  | 3.51  | 3.82  | 4.77   | 4.87  | 1.36  |  | 05.07.14                                                                                                                                         |
| 314 | Poly(C)-binding protein 1                                  | OS-Musculus | GN-Pcbp1   | PE1 | SV1  | 11  | PCBP1   | MOUSE   | 38 kDa  | 21.81 | 5.92  | 28.69  | 4.85  | 1.36  |  | PCBP1 binds to telomeric DNA in vitro<br>Lacour, Nucleic Acids Res. (2000) 28: 1564-1575<br>Bardack, Arch. Biochem. Biophys. (2003) 420: 259-274 |
| 315 | Cullin-associated NEDD8-dissociated protein 1              | OS-Musculus | GN-Cand1   | PE2 | SV-2 | 11  | CAND1   | MOUSE   | 138 kDa | 1.28  | 2.18  | 1.7    | 1.85  | 1.35  |  | 05.07.10                                                                                                                                         |
| 316 | Fatty acid synthase                                        | OS-Musculus | GN-Fasn    | PE1 | SV-2 | 11  | FAS     | MOUSE   | 272 kDa | 19.38 | 26.69 | 26.65  | 3.39  | 1.34  |  | 05.08.10                                                                                                                                         |
| 317 | Cleavage and polyadenylation specificity factor subunit 6  | OS-Musculus | GN-Cpsf6   | PE1 | SV1  | 11  | CPSF6   | MOUSE   | 126 kDa | 10.29 | 10.29 | 10.29  | 10.29 | 1.34  |  | 05.08.10                                                                                                                                         |
| 318 | Chloride intracellular channel protein 1                   | OS-Musculus | GN-Cic1    | PE1 | SV-3 | 11  | CLIC1   | MOUSE   | 27 kDa  | 7.82  | 3.25  | 10.44  | 7.65  | 1.33  |  | 05.06.11                                                                                                                                         |
| 319 | Poly(C)-binding protein 1                                  | OS-Musculus | GN-Pcbp1   | PE1 | SV1  | 11  | PCBP1   | MOUSE   | 37 kDa  | 25.78 | 6.2   | 34.25  | 6.86  | 1.33  |  | PCBP1 binds to telomeric DNA in vitro<br>Lacour, Nucleic Acids Res. (2000) 28: 1564-1575<br>Bardack, Arch. Biochem. Biophys. (2003) 420: 259-274 |
| 320 | Splicing factor U2AF 35 kDa subunit                        | OS-Musculus | GN-Uzaf1   | PE1 | SV1  | 11  | UZAF1   | MOUSE   | 28 kDa  | 11.5  | 3.25  | 15.18  | 5.25  | 1.32  |  | 05.05.09.28                                                                                                                                      |
| 321 | Nucleotriphosphate phosphatase                             | OS-Musculus | GN-Ntp     | PE1 | SV1  | 11  | NTF     | MOUSE   | 9 kDa   | 17.41 | 6.09  | 23.68  | 11.29 | 1.32  |  | 05.05.09.28                                                                                                                                      |
| 322 | Heterogeneous nuclear ribonucleoprotein K                  | OS-Musculus | GN-Hnrkp   | PE1 | SV1  | 11  | HNRK    | MOUSE   | 118 kDa | 11.84 | 10.62 | 13.12  | 1.29  | 1.31  |  | 05.05.09.28                                                                                                                                      |
| 323 | NEDD8-covalent enzyme Ubr1                                 | OS-Musculus | GN-Ubr1    | PE2 | SV-2 | 11  | UBR1    | MOUSE   | 21 kDa  | 4.28  | 1.47  | 5.61   | 2.05  | 1.31  |  | 05.04.11                                                                                                                                         |
| 324 | Calcium homeostasis endoplasmic reticulum protein          | OS-Musculus | GN-Cherp   | PE1 | SV1  | 11  | CHERP   | MOUSE   | 108 kDa | 1.68  | 1.52  | 2.2    | 2.26  | 1.31  |  | 05.07.10                                                                                                                                         |
| 325 | Proteasome subunit alpha type-7                            | OS-Musculus | GN-Psm17   | PE1 | SV1  | 11  | PSA1    | MOUSE   | 28 kDa  | 0.99  | 1.2   | 6.91   | 1.96  | 1.31  |  | 05.08.11                                                                                                                                         |
| 326 | Selenin factor 2                                           | OS-Musculus | GN-Sf2     | PE1 | SV-8 | 11  | SF2     | MOUSE   | 68 kDa  | 11.26 | 6.92  | 10.29  | 12.93 | 1.31  |  | 05.07.10                                                                                                                                         |
| 327 | Heat shock protein HSP- $\beta$                            | OS-Musculus | GN-Hspb1   | PE1 | SV1  | 11  | HSPB1   | MOUSE   | 63 kDa  | 61.28 | 10.15 | 74.21  | 8.03  | 1.3   |  | 05.08.10                                                                                                                                         |
| 328 | RNA binding motif protein, X-linked-like 1                 | OS-Musculus | GN-Rbm1    | PE1 | SV1  | 11  | RBM1    | MOUSE   | 42 kDa  | 18.41 | 0.59  | 24.55  | 5.26  | 1.28  |  | 05.05.10                                                                                                                                         |
| 329 | Centriole-dominant protein 1                               | OS-Musculus | GN-Cdp1    | PE1 | SV1  | 11  | CDP1    | MOUSE   | 128 kDa | 10.8  | 10.78 | 20.01  | 19.68 | 1.28  |  | 05.08.10                                                                                                                                         |
| 330 | -3'-5' uridine phosphorylase 2                             | OS-Musculus | GN-Urp2    | PE1 | SV1  | 11  | URP2    | MOUSE   | 109 kDa | 9     | 4.33  | 11.48  | 1.27  | 1.27  |  | 05.04.12                                                                                                                                         |
| 331 | Polykinesin tract-binding protein 1                        | OS-Musculus | GN-Pktb1   | PE1 | SV1  | 11  | PKTB1   | MOUSE   | 71 kDa  | 12.41 | 6.55  | 18.58  | 16.39 | 1.27  |  | 05.08.11                                                                                                                                         |
| 332 | Heterogeneous nuclear ribonucleoprotein D                  | OS-Musculus | GN-Hnrpdl  | PE1 | SV1  | 11  | HNRD    | MOUSE   | 126 kDa | 7.98  | 12.84 | 12.84  | 12.84 | 1.27  |  | 05.08.11                                                                                                                                         |
| 333 | Histone-binding protein RBBP4                              | OS-Musculus | GN-Rbbp4   | PE1 | SV-5 | 11  | RBBP4   | MOUSE   | 48 kDa  | 1.26  | 1.06  | 1.621  | 0.76  | 1.27  |  | 05.07.10                                                                                                                                         |
| 334 | Heterogeneous nuclear ribonucleoprotein G                  | OS-Musculus | GN-Hnrgp   | PE1 | SV1  | 11  | HNRPG   | MOUSE   | 70 kDa  | 15.96 | 4.29  | 20.25  | 8.52  | 1.27  |  | 05.08.10                                                                                                                                         |
| 335 | OS- $\beta$ -casein receptor L77                           | OS-Musculus | GN-R77     | PE2 | SV-2 | 11  | R77     | MOUSE   | 18 kDa  | 4.56  | 3.95  | 3.92   | 1.38  | 1.27  |  | 05.08.11                                                                                                                                         |
| 336 | Iron-binding protein 2                                     | OS-Musculus | GN-Irbp2   | PE2 | SV-2 | 11  | IRBP2   | MOUSE   | 28 kDa  | 2.86  | 2.86  | 2.86   | 2.86  | 1.27  |  | 05.08.11                                                                                                                                         |
| 337 | Nucleolin                                                  | OS-Musculus | GN-Ncl     | PE1 | SV1  | 11  | NCL     | MOUSE   | 43 kDa  | 2.34  | 2.69  | 2.69   | 2.69  | 1.26  |  | 05.07.10                                                                                                                                         |
| 338 | RNA Ligase 5                                               | OS-Musculus | GN-Rlm5    | PE1 | SV1  | 11  | RLM5    | MOUSE   | 63 kDa  | 6.72  | 4.13  | 8.45   | 1.3   | 1.25  |  | 05.08.11                                                                                                                                         |
| 339 | Protein tyrosine phosphatase SH-PTPase                     | OS-Musculus | GN-Shptp   | PE1 | SV1  | 11  | PTP     | MOUSE   | 116 kDa | 61.98 | 11.09 | 61.98  | 11.09 | 1.25  |  | 05.05.10                                                                                                                                         |
| 340 | Protein KIAA1871 homolog                                   | OS-Musculus | GN-Kia1871 | PE1 | SV1  | 11  | KIA1871 | MOUSE   | 103 kDa | 6.59  | 6.34  | 8.24   | 2.6   | 1.25  |  | 05.03.14                                                                                                                                         |
| 341 | Heat cell factor 1                                         | OS-Musculus | GN-Hcf1    | PE1 | SV1  | 11  | HCF1    | MOUSE   | 210 kDa | 9.63  | 4.36  | 12.01  | 1.89  | 1.25  |  | 05.04.10                                                                                                                                         |
| 342 | Heterogeneous nuclear ribonucleoprotein A2/B1              | OS-Musculus | GN-Hnrapa2 | PE1 | SV1  | 11  | HNRPA2  | MOUSE   | 37 kDa  | 10.79 | 10.1  | 100.25 | 22.71 | 1.24  |  | 05.05.10                                                                                                                                         |
| 343 | RNA turnover factor 4                                      | OS-Musculus | GN-Rnf4    | PE2 | SV1  | 11  | RNF4    | MOUSE   | 25 kDa  | 2.65  | 2.65  | 2.65   | 2.65  | 1.24  |  | 05.08.11                                                                                                                                         |
| 344 | T-complex protein 1 subunit beta                           | OS-Musculus | GN-Tcpt1   | PE1 | SV1  | 11  | TCPB1   | MOUSE   | 37 kDa  | 2.83  | 4.91  | 3.9    | 3.61  | 1.24  |  | 05.08.10                                                                                                                                         |
| 345 | Protein DJ-1                                               | OS-Musculus | GN-Park1   | PE1 | SV1  | 11  | PARK1   | MOUSE   | 26 kDa  | 3.24  | 2.1   | 4.01   | 6.83  | 1.24  |  | 05.08.11                                                                                                                                         |
| 346 | RNA-binding protein 10                                     | OS-Musculus | GN-Rbp10   | PE1 | SV1  | 11  | RBP10   | MOUSE   | 85 kDa  | 10.8  | 10.8  | 10.8   | 10.8  | 1.23  |  | 05.08.10                                                                                                                                         |
| 347 | Serine/arginine-rich splicing factor 10                    | OS-Musculus | GN-Srsf10  | PE1 | SV1  | 11  | SRSF10  | MOUSE   | 31 kDa  | 6.1   | 4.89  | 7.53   | 5.32  | 1.23  |  | 05.07.10                                                                                                                                         |
| 348 | Heterogeneous nuclear ribonucleoprotein H                  | OS-Musculus | GN-Hnrpnh1 | PE1 | SV1  | 11  | HNRH1   | MOUSE   | 49 kDa  | 42.44 | 16.01 | 52.25  | 6.54  | 1.23  |  | 05.08.10                                                                                                                                         |
| 349 | Lipin 4-like 8                                             | OS-Musculus | GN-Lip4l8  | PE1 | SV1  | 11  | LIP4L8  | MOUSE   | 50 kDa  | 21.45 | 4.86  | 26.37  | 2.03  | 1.23  |  | 05.08.11                                                                                                                                         |
| 350 | Heterogeneous nuclear ribonucleoprotein I                  | OS-Musculus | GN-Hnrpnl  | PE1 | SV1  | 11  | HNRPI   | MOUSE   | 52 kDa  | 6.96  | 6.96  | 6.96   | 6.96  | 1.23  |  | 05.08.10                                                                                                                                         |
| 351 | Heterogeneous nuclear ribonucleoprotein L                  | OS-Musculus | GN-Hnrpl   | PE1 | SV1  | 11  | HNRPL   | MOUSE   | 64 kDa  | 45.97 | 13.1  | 56.37  | 16.17 | 1.23  |  | 05.04.11                                                                                                                                         |
| 352 | RNA-binding protein FUS                                    | OS-Musculus | GN-Fus     | PE2 | SV1  | 11  | FUS     | MOUSE   | 53 kDa  | 14.02 | 6.96  | 19.63  | 7.37  | 1.23  |  | 05.07.10                                                                                                                                         |
| 353 | Heterogeneous nuclear ribonucleoprotein C1                 | OS-Musculus | GN-Hnrpnc1 | PE1 | SV1  | 11  | HNRPC1  | MOUSE   | 67 kDa  | 67.2  | 12.52 | 67.2   | 12.52 | 1.23  |  | 05.05.10                                                                                                                                         |
| 354 | RNA-binding protein EWS                                    | OS-Musculus | GN-Ewsr1   | PE1 | SV1  | 11  | EWS     | MOUSE   | 68 kDa  | 5.63  | 1.16  | 6.84   | 1.76  | 1.22  |  | 05.07.10                                                                                                                                         |
| 355 | RNA-binding protein Ray                                    | OS-Musculus | GN-Ray     | PE1 | SV1  | 11  | RAY     | MOUSE   | 33 kDa  | 23.32 | 7.14  | 28.37  | 3.66  | 1.22  |  | 05.03.14                                                                                                                                         |
| 356 | DNA damage-binding protein 1                               | OS-Musculus | GN-Ddb1    | PE1 | SV1  | 11  | DDB1    | MOUSE   | 117 kDa | 13.1  | 5.55  | 16.66  | 9.52  | 1.22  |  | 05.08.11                                                                                                                                         |
| 357 | OS- $\beta$ -casein receptor L77                           | OS-Musculus | GN-R77     | PE2 | SV-2 | 11  | R77     | MOUSE   | 18 kDa  | 4.56  | 3.95  | 3.92   | 1.38  | 1.22  |  | 05.08.11                                                                                                                                         |
| 358 | Heterogeneous nuclear ribonucleoprotein A1                 | OS-Musculus | GN-Hnrapa1 | PE1 | SV1  | 11  | HNRPA1  | MOUSE   | 94 kDa  | 9.61  | 2.26  | 11.24  | 13.01 | 1.19  |  | 05.08.10                                                                                                                                         |
| 359 | Probable ATP-dependent RNA helicase DDX3                   | OS-Musculus | GN-Ddx3    | PE1 | SV1  | 11  | DDX3    | MOUSE   | 69 kDa  | 75.19 | 31.5  | 89.25  | 41.05 | 1.19  |  | 05.08.10                                                                                                                                         |
| 360 | Inositol hexaphosphate kinase                              | OS-Musculus | GN-Itih1   | PE1 | SV1  | 11  | ITIH1   | MOUSE   | 81 kDa  | 9.12  | 1.64  | 11.4   | 1.64  | 1.19  |  | 05.07.10                                                                                                                                         |
| 361 | Ribosome processing factor 2 homolog                       | OS-Musculus | GN-Rpf2    | PE2 | SV-2 | 11  | RPF2    | MOUSE   | 35 kDa  | 4.55  | 5.44  | 7.81   | 4.33  | 1.19  |  | 05.07.10                                                                                                                                         |
| 362 | Interleukin enhancer-binding factor 3                      | OS-Musculus | GN-Ifi3    | PE1 | SV1  | 11  | IFI3    | MOUSE   | 66 kDa  | 6.96  | 7.89  | 8.11   | 9.75  | 1.18  |  | 05.08.11                                                                                                                                         |
| 363 | Heat shock protein HSP- $\beta$                            | OS-Musculus | GN-Hspb1   | PE1 | SV1  | 11  | HSPB1   | MOUSE   | 63 kDa  | 61.28 | 10.15 | 74.21  | 8.03  | 1.18  |  | 05.07.10                                                                                                                                         |
| 364 | Probable ATP-dependent RNA helicase DDX11                  | OS-Musculus | GN-Ddx11   | PE2 | SV1  | 11  | DDX11   | MOUSE   | 72 kDa  | 45.82 | 18.81 | 49.89  | 35.15 | 1.18  |  | 05.07.10                                                                                                                                         |
| 365 | Small pre-mRNA-splicing factor 5                           | OS-Musculus | GN-Sm5     | PE2 | SV1  | 11  | SM5     | MOUSE   | 91 kDa  | 26.3  | 3.41  | 31.04  | 6.61  | 1.18  |  | 05.03.10                                                                                                                                         |
| 366 | Platanin RNA-binding protein 1                             | OS-Musculus | GN-Rbm1    | PE1 | SV1  | 11  | RBM1    | MOUSE   | 78 kDa  | 7.58  | 1.31  | 9.29   | 5.37  | 1.18  |  | 05.08.11                                                                                                                                         |
| 367 | ATP-dependent RNA helicase DDX1                            | OS-Musculus | GN-Ddx1    | PE1 | SV1  | 11  | DDX1    | MOUSE   | 62 kDa  | 10.29 | 10.29 | 10.29  | 10.29 | 1.18  |  | 05.08.11                                                                                                                                         |
| 368 | Pre-mRNA processing factor 40                              | OS-Musculus | GN-Pyf40   | PE1 | SV1  | 11  | PRF40   | MOUSE</ |         |       |       |        |       |       |  |                                                                                                                                                  |

|     |                                                                                                                                     |                |          |       |        |       |        |      |
|-----|-------------------------------------------------------------------------------------------------------------------------------------|----------------|----------|-------|--------|-------|--------|------|
| 438 | CWF19-like protein 1 OS-Mus musculus GN-Cwf19L1 PE1-2 SV-2                                                                          | C19L1_MOUSE    | 60 kDa   | 0.99  | 1.2    | 0.7   | 1.21   | 1.01 |
| 439 | kappa chain V-V region R2 C7-fragment OS-Mus musculus PE1-1 SV-1                                                                    | KYSAA_MOUSE    | 13 kDa   | 0.99  | 1.2    | 0.7   | 1.21   | 1.01 |
| 440 | 60S ribosomal protein L2 OS-Mus musculus GN-RpL2 PE1-2 SV-3                                                                         | L2_MOUSE       | 12.2 kDa | 1.2   | 1.2    | 0.7   | 1.21   | 1.01 |
| 441 | Small nuclear ribonucleoprotein E OS-Mus musculus GN-SnrE PE1-2 SV-1                                                                | SNR5_MOUSE     | 44 kDa   | 0.99  | 1.2    | 0.7   | 1.21   | 1.01 |
| 442 | Spermidine synthase OS-Mus musculus GN-Sm PE1-2 SV-1                                                                                | SPE_MOUSE      | 34 kDa   | 0.99  | 1.2    | 0.7   | 1.21   | 1.01 |
| 443 | NORC family C17-like factor protein 2A OS-Mus musculus GN-Norc2a PE1-2 SV-2                                                         | NORC2_MOUSE    | 17.4 kDa | 1.01  | 1.01   | 1.01  | 1.01   | 1.01 |
| 444 | Heterogeneous nuclear ribonucleoprotein R OS-Homo sapiens GN-HNRPR PE1-1 SV-1                                                       | HNRPR_HUMAN    | 71 kDa   | 1.74  | 3.01   | 1.75  | 3.04   | 1.01 |
| 445 | 60S ribosomal protein S25 OS-Mus musculus GN-Rps25 PE1-1 SV-1                                                                       | RPS25_MOUSE    | 13.9     | 2.41  | 1.4    | 2.43  | 1.01   | 1.01 |
| 446 | Ribosome biogenesis protein BRX1 homolog OS-Mus musculus GN-Brx1 PE1-2 SV-2                                                         | BRX1_MOUSE     | 41 kDa   | 1.04  | 1.81   | 1.09  | 1.82   | 1.01 |
| 447 | Transcription elongation factor SPTB OS-Mus musculus GN-Sptb PE1-1 SV-2                                                             | SPTB_MOUSE     | 199 kDa  | 1.04  | 1.81   | 1.09  | 1.82   | 1.01 |
| 448 | Ribosome biogenesis protein NSA2 homolog OS-Mus musculus GN-Nsa2 PE1-2 SV-1                                                         | NSA2_MOUSE     | 30 kDa   | 1.04  | 1.81   | 1.09  | 1.82   | 1.01 |
| 449 | Kinesin-like protein KPR2A OS-Mus musculus GN-Kpr2a PE1-2 SV-1                                                                      | KPR2A_MOUSE    | 100 kDa  | 1.04  | 1.81   | 1.09  | 1.82   | 1.01 |
| 450 | Protein arginine methyltransferase 1 OS-Mus musculus GN-Prmt1 PE1-1 SV-1                                                            | PRMT1_MOUSE    | 22 kDa   | 2.31  | 5.57   | 2.45  | 5.74   | 1.01 |
| 451 | Elongation factor 1-alpha 1 OS-Mus musculus GN-Euf1a1 PE1-1 SV-3                                                                    | EUF1A_MOUSE    | 90 kDa   | 99.79 | 237.72 | 67.28 | 329.99 | 1.01 |
| 452 | Crooked neck-like protein 1 OS-Mus musculus GN-Cnrl1 PE1-2 SV-1                                                                     | CNRL1_MOUSE    | 83 kDa   | 3.62  | 6.44   | 3.64  | 6.45   | 1.01 |
| 453 | Structural protein bescytm2a protein PWRN OS-Mus musculus GN-Pwrn PE1-1 SV-2                                                        | PWRN_MOUSE     | 84 kDa   | 2.80  | 4.91   | 2.83  | 5.2    | 1.01 |
| 454 | Cell division cycle 7-like protein OS-Mus musculus GN-Cdc7l PE1-1 SV-2                                                              | CDC7L_MOUSE    | 85 kDa   | 3.96  | 9.30   | 4.04  | 9.66   | 1.01 |
| 455 | Nucleoside diphosphate kinase B OS-Mus musculus GN-NdkB PE1-1 SV-1                                                                  | NDKB_MOUSE     | 17 kDa   | 8.56  | 7.78   | 8.67  | 7.62   | 1.01 |
| 456 | Zinc finger RNA-binding protein OS-Mus musculus GN-Zfp PE1-1 SV-1                                                                   | ZFR_MOUSE      | 117 kDa  | 5.1   | 2.76   | 5.65  | 5.79   | 0.99 |
| 457 | Quercetin nucleotide-binding protein 3 OS-Mus musculus GN-Qubp3 PE1-1 SV-2                                                          | QUBP3_MOUSE    | 91 kDa   | 14.41 | 7.65   | 14.29 | 9.55   | 0.99 |
| 458 | DNA replication licensing factor MCM8 OS-Mus musculus GN-Mcm8 PE1-1 SV-1                                                            | MCM8_MOUSE     | 93 kDa   | 37.1  | 7.13   | 36.65 | 15.36  | 0.99 |
| 459 | High mobility group protein B2 OS-Mus musculus GN-Hmb2 PE1-1 SV-3                                                                   | HMB2_MOUSE     | 24 kDa   | 29.29 | 3.85   | 29.8  | 5.04   | 0.98 |
| 460 | DNA minimal repeat protein MMR OS-Mus musculus GN-Mmr PE1-1 SV-2                                                                    | MMR_MOUSE      | 103 kDa  | 10.26 | 2.31   | 10.11 | 3.36   | 0.98 |
| 461 | Histone deacetylase 1 OS-Mus musculus GN-Hdac1 PE1-1 SV-1                                                                           | HDAC1_MOUSE    | 95 kDa   | 7.99  | 3.78   | 7.77  | 6.6    | 0.98 |
| 462 | 60S ribosomal protein L35a OS-Mus musculus GN-Rpl35a PE1-2 SV-2                                                                     | RPL35A_MOUSE   | 13 kDa   | 7.54  | 2.02   | 7.38  | 6.76   | 0.98 |
| 463 | Small nuclear ribonucleoprotein Sm D2 OS-Mus musculus GN-Smnd2 PE1-2 SV-1                                                           | SMND2_MOUSE    | 14 kDa   | 13.93 | 10.44  | 13.59 | 7.29   | 0.97 |
| 464 | Cytosolic pyruvate 3-methylcrotonyltransferase OS-Mus musculus GN-P3mt PE1-1 SV-2                                                   | P3MT_MOUSE     | 60 kDa   | 3.98  | 3.79   | 3.9   | 3.17   | 0.97 |
| 465 | T-complex protein 1 subunit eta OS-Mus musculus GN-Tcpe1 PE1-1 SV-1                                                                 | TCPE1_MOUSE    | 80 kDa   | 3.15  | 5.45   | 3.03  | 2.78   | 0.96 |
| 466 | DNA replication licensing factor MCM3 OS-Mus musculus GN-Mcm3 PE1-1 SV-2                                                            | MCM3_MOUSE     | 92 kDa   | 37.38 | 6.83   | 35.92 | 3.37   | 0.96 |
| 467 | Structural maintenance of chromosomes protein 2 OS-Mus musculus GN-Smc2 PE1-1 SV-2                                                  | SMC2_MOUSE     | 154 kDa  | 10.49 | 7.62   | 10.49 | 2.11   | 0.96 |
| 468 | RNA (cytosine-5'-C)-methyltransferase OS-Mus musculus GN-Nmt2 PE1-1 SV-2                                                            | NMT2_MOUSE     | 85 kDa   | 10.4  | 1.81   | 10.14 | 1.85   | 0.96 |
| 469 | MuB-binding protein 1A OS-Mus musculus GN-Muba1a PE1-1 SV-1                                                                         | MBA1_MOUSE     | 152 kDa  | 88.99 | 21.88  | 83.14 | 20.38  | 0.96 |
| 470 | DNA primase small subunit OS-Mus musculus GN-Prim1 PE1-1 SV-2                                                                       | PRIM1_MOUSE    | 49 kDa   | 0.94  | 1.65   | 0.95  | 1.56   | 0.95 |
| 471 | Polychrom protein Suv12 OS-Mus musculus GN-Suv12 PE1-1 SV-1                                                                         | SUV12_MOUSE    | 82 kDa   | 1.92  | 3.78   | 1.93  | 3.71   | 0.95 |
| 472 | Peptidylglycyl isomerase domain and WD repeat-containing protein 1 OS-Mus musculus GN-Ppwt1 PE1-2 SV-2                              | PPWT1_MOUSE    | 73 kDa   | 0.63  | 1.09   | 0.6   | 1.04   | 0.95 |
| 473 | DNA homolog of zifandin C member B OS-Mus musculus GN-Dnagb PE1-2 SV-2                                                              | DNAGB_MOUSE    | 30 kDa   | 0.63  | 1.09   | 0.6   | 1.04   | 0.95 |
| 474 | Protein ELT3 OS-Mus musculus GN-El3 PE1-1 SV-1                                                                                      | ELT3_MOUSE     | 81 kDa   | 1.65  | 2.98   | 1.66  | 2.94   | 0.95 |
| 475 | Cleavage and polyadenylation specificity factor subunit 5 OS-Mus musculus GN-Cpsf5 PE1-2 SV-1                                       | CPSF5_MOUSE    | 26 kDa   | 6.48  | 3.83   | 6.15  | 3.43   | 0.95 |
| 476 | Aspartate--RNA ligase, cytosolic OS-Mus musculus GN-Dars PE1-2 SV-2                                                                 | DARS_MOUSE     | 57 kDa   | 2.92  | 2.97   | 2.73  | 2.73   | 0.94 |
| 477 | kappa chain C7 OS-Mus musculus PE1-1 SV-1                                                                                           | K7_MOUSE       | 12 kDa   | 74.21 | 15.76  | 74.21 | 6.32   | 0.93 |
| 478 | Salivary factor 3B subunit OS-Mus musculus GN-Sfb3b PE1-1 SV-1                                                                      | SFB3B_MOUSE    | 144 kDa  | 15.8  | 16.45  | 15.14 | 6.66   | 0.93 |
| 479 | Transcription elongation factor SPTB OS-Mus musculus GN-Sptb PE1-1 SV-1                                                             | SPTB_MOUSE     | 192 kDa  | 15.4  | 16.68  | 14.67 | 6.48   | 0.93 |
| 480 | Eukaryotic initiation factor 4A-1 OS-Mus musculus GN-Eif4a1 PE1-1 SV-1                                                              | EIF4A_MOUSE    | 46 kDa   | 20.58 | 7.04   | 18.76 | 6.27   | 0.93 |
| 481 | Proteasome subunit alpha OS-Mus musculus GN-Psi1 PE1-1 SV-1                                                                         | PSI1_MOUSE     | 107 kDa  | 2.98  | 3.29   | 2.81  | 3.08   | 0.93 |
| 482 | Platelet-activating factor acetylcholinesterase OS-Mus musculus GN-Pafah1b1 PE1-1 SV-2                                              | PAFAH1B1_MOUSE | 47 kDa   | 3.22  | 2.79   | 2.8   | 2.73   | 0.93 |
| 483 | DNA replication licensing factor MCM4 OS-Mus musculus GN-Mcm4 PE1-1 SV-1                                                            | MCM4_MOUSE     | 82 kDa   | 34.88 | 4.22   | 31.27 | 6.31   | 0.93 |
| 484 | Lucl7-like protein 3 OS-Mus musculus GN-Lucl7 PE1-1 SV-1                                                                            | LUCL7_MOUSE    | 51 kDa   | 3.69  | 1.68   | 3.3   | 1.17   | 0.93 |
| 485 | Serine-arginine-rich nuclear factor 1 OS-Mus musculus GN-Srf1 PE1-1 SV-3                                                            | SRF1_MOUSE     | 102 kDa  | 6.09  | 6.09   | 31.4  | 6.11   | 0.93 |
| 486 | 60S ribosomal protein S17 OS-Mus musculus GN-Rps17 PE1-1 SV-2                                                                       | RPS17_MOUSE    | 18 kDa   | 6.11  | 5.3    | 5.47  | 5.5    | 0.89 |
| 487 | Protein magi1 homolog OS-Mus musculus GN-Magi1 PE1-2 SV-2                                                                           | MAG1_MOUSE     | 17 kDa   | 3.66  | 4.66   | 3.27  | 2.89   | 0.89 |
| 488 | Keratin, type II cytoskeletal 1A OS-Mus musculus GN-Krt1a PE1-2 SV-3                                                                | KRT1A_MOUSE    | 52 kDa   | 1.81  | 2.22   | 1.81  | 2.22   | 0.89 |
| 489 | Lymphocyte-specific helicase OS-Mus musculus GN-Hels PE1-1 SV-2                                                                     | HELLS_MOUSE    | 95 kDa   | 15.41 | 3.27   | 13.71 | 1.42   | 0.89 |
| 490 | Regulator of chromosome condensation OS-Mus musculus GN-Rcc1 PE1-1 SV-1                                                             | RCC1_MOUSE     | 45 kDa   | 4.18  | 3.83   | 3.71  | 3.37   | 0.89 |
| 491 | Prokaryotic ATP-dependent RNA helicase DDX4 OS-Mus musculus GN-Ddx4 PE1-1 SV-2                                                      | DDX4_MOUSE     | 117 kDa  | 21.99 | 6.06   | 18.46 | 3.29   | 0.89 |
| 492 | Actin-1 OS-Mus musculus GN-Act1 PE1-1 SV-1                                                                                          | ACT1_MOUSE     | 42 kDa   | 88.44 | 19.91  | 61.34 | 19.71  | 0.89 |
| 493 | 60S ribosomal protein L14 OS-Mus musculus GN-Rpl14 PE1-2 SV-3                                                                       | RPL14_MOUSE    | 24 kDa   | 7.1   | 6.27   | 6.27  | 3.87   | 0.88 |
| 494 | High mobility group protein B1 OS-Mus musculus GN-Hmb1 PE1-1 SV-2                                                                   | HMB1_MOUSE     | 25 kDa   | 28.84 | 6.95   | 25.45 | 5.44   | 0.88 |
| 495 | Fluoride RNA-binding protein Lucl7 OS-Mus musculus GN-Lucl7 PE1-1 SV-1                                                              | LUCL7_MOUSE    | 51 kDa   | 3.69  | 1.68   | 3.3   | 1.17   | 0.88 |
| 496 | 60S ribosomal protein L30 OS-Mus musculus GN-Rp30 PE1-2 SV-2                                                                        | RPL30_MOUSE    | 13 kDa   | 2.96  | 0.95   | 2.8   | 2.28   | 0.88 |
| 497 | Lupas La protein homolog OS-Mus musculus GN-Sla PE1-2 SV-1                                                                          | LA_MOUSE       | 48 kDa   | 24.1  | 1.2    | 21.12 | 4.4    | 0.88 |
| 498 | Histone-binding protein HBP1 OS-Mus musculus GN-Hbp1 PE1-1 SV-1                                                                     | HBP1_MOUSE     | 12 kDa   | 10.26 | 6.16   | 10.26 | 7.71   | 0.88 |
| 499 | kappa chain Y-I region 2B-1B OS-Mus musculus PE1-1 SV-1                                                                             | KVY2B_MOUSE    | 12 kDa   | 49.43 | 13.26  | 49.43 | 10.12  | 0.87 |
| 500 | 60S ribosomal protein L21 OS-Mus musculus GN-Rpl21 PE1-2 SV-3                                                                       | RPL21_MOUSE    | 34 kDa   | 3.18  | 3.78   | 3.34  | 1.03   | 0.87 |
| 501 | Chromobox protein homolog 5 OS-Mus musculus GN-Cbx5 PE1-1 SV-1                                                                      | CBX5_MOUSE     | 22 kDa   | 8.64  | 3.74   | 8.34  | 4.69   | 0.87 |
| 502 | Protein core histone H4 OS-Mus musculus GN-H4 PE1-1 SV-1                                                                            | H4_MOUSE       | 17 kDa   | 14.2  | 17.69  | 14.2  | 17.69  | 0.87 |
| 503 | Small nuclear ribonucleoprotein Sm D3 OS-Mus musculus GN-Smnd3 PE1-1 SV-1                                                           | SMND3_MOUSE    | 14 kDa   | 14.98 | 5.17   | 13.88 | 4.35   | 0.87 |
| 504 | Small ubiquitin-related modifier 2 OS-Mus musculus GN-Smur2 PE1-1 SV-1                                                              | SMUR2_MOUSE    | 11 kDa   | 1.024 | 4.24   | 1.234 | 4.36   | 0.87 |
| 505 | Ubiquitin-protein ligase UBR1 OS-Mus musculus GN-Ubr1 PE1-1 SV-2                                                                    | UBR1_MOUSE     | 104 kDa  | 10.56 | 10.64  | 10.4  | 9.37   | 0.87 |
| 506 | Serine-arginine-rich splicing factor 3 OS-Mus musculus GN-Srsf3 PE1-1 SV-1                                                          | SRSF3_MOUSE    | 19 kDa   | 10.98 | 4.63   | 9.21  | 4.77   | 0.86 |
| 507 | Ubiquitin carboxyl-terminal hydrolase 7 OS-Mus musculus GN-Ubr7 PE1-1 SV-1                                                          | UBR7_MOUSE     | 128 kDa  | 1.04  | 1.81   | 0.9   | 1.56   | 0.86 |
| 508 | Heterogeneous nuclear ribonucleoprotein L-like protein 2 OS-Mus musculus GN-Hnrnp2l PE1-1 SV-1                                      | HNR2L_MOUSE    | 89 kDa   | 19.91 | 1.74   | 16.96 | 1.32   | 0.86 |
| 509 | ACT complex subunit 3B OS-Mus musculus GN-Actb3 PE1-1 SV-1                                                                          | ACTB3_MOUSE    | 9 kDa    | 1.9   | 3.9    | 1.9   | 3.9    | 0.86 |
| 510 | 60S ribosomal protein L23 OS-Mus musculus GN-Rp23 PE1-1 SV-1                                                                        | RPL23_MOUSE    | 15 kDa   | 5.18  | 2.81   | 4.98  | 1.18   | 0.85 |
| 511 | DNA replication licensing factor MCM4 OS-Mus musculus GN-Mcm4 PE1-1 SV-2                                                            | MCM4_MOUSE     | 81 kDa   | 12.98 | 5.82   | 12.72 | 5.86   | 0.84 |
| 512 | Ribosome biogenesis protein NSA2 OS-Mus musculus GN-Nsa2 PE1-2 SV-1                                                                 | NSA2_MOUSE     | 30 kDa   | 10.49 | 7.62   | 10.49 | 6.01   | 0.84 |
| 513 | 60S ribosomal protein L15 OS-Mus musculus GN-Rpl15 PE1-2 SV-4                                                                       | RPL15_MOUSE    | 24 kDa   | 10.48 | 1.97   | 8.64  | 0.3    | 0.84 |
| 514 | WD40 repeat-containing protein SMJ1 OS-Mus musculus GN-Smj1 PE1-1 SV-3                                                              | SMJ1_MOUSE     | 98 kDa   | 7.64  | 1.32   | 6.98  | 1.1    | 0.83 |
| 515 | ACK1 ribonucleoprotein complex subunit 4 OS-Mus musculus GN-Ack4 PE1-1 SV-4                                                         | ACK4_MOUSE     | 93 kDa   | 3.47  | 4.75   | 4.54  | 4.16   | 0.83 |
| 516 | Transformin-2 protein homolog alpha OS-Mus musculus GN-Tf2 PE1-1 SV-2                                                               | TF2_MOUSE      | 102 kDa  | 10.9  | 6.28   | 10.9  | 6.83   | 0.83 |
| 517 | Splicing factor 3B subunit 3 OS-Mus musculus GN-Sf3b3 PE1-1 SV-1                                                                    | SF3B3_MOUSE    | 138 kDa  | 11.88 | 4.05   | 15.61 | 4.71   | 0.83 |
| 518 | Serine-arginine-rich splicing factor 1 OS-Mus musculus GN-Srsf1 PE1-1 SV-1                                                          | SRSF1_MOUSE    | 17 kDa   | 17.41 | 3.37   | 14.28 | 2.87   | 0.82 |
| 519 | Head shock protein 1B OS-Mus musculus GN-Hsp1b1 PE1-1 SV-1                                                                          | HSP1B_MOUSE    | 92 kDa   | 1.82  | 3.12   | 1.82  | 3.12   | 0.82 |
| 520 | Tubulin beta-5 chain OS-Mus musculus GN-Tub5 PE1-1 SV-1                                                                             | TUBB5_MOUSE    | 50 kDa   | 27.34 | 17.41  | 22.32 | 11.43  | 0.82 |
| 521 | 21-activated protein kinase-interacting protein 1 OS-Mus musculus GN-Pak1p1 PE1-2 SV-2                                              | PAK1P1_MOUSE   | 42 kDa   | 5.27  | 0.37   | 4.3   | 3.73   | 0.82 |
| 522 | Nucleolar protein 36 OS-Mus musculus GN-Np36 PE1-1 SV-2                                                                             | NP36_MOUSE     | 64 kDa   | 25.83 | 3.65   | 20.86 | 5.51   | 0.81 |
| 523 | ATP-dependent RNA helicase DDX3A OS-Mus musculus GN-Ddx3a PE1-1 SV-2                                                                | DDX3A_MOUSE    | 82 kDa   | 10.9  | 4.81   | 6.31  | 4.67   | 0.81 |
| 524 | 60S ribosomal protein L26 OS-Mus musculus GN-Rp26 PE1-1 SV-1                                                                        | RPL26_MOUSE    | 17 kDa   | 8.45  | 4.41   | 6.34  | 5.37   | 0.81 |
| 525 | DNA replication licensing factor MCM6 OS-Mus musculus GN-Mcm6 PE1-1 SV-1                                                            | MCM6_MOUSE     | 105 kDa  | 31.12 | 6.95   | 24.81 | 4.28   | 0.8  |
| 526 | Prokaryotic L1 small nuclear ribonucleoprotein L1 OS-Mus musculus GN-L1 PE1-2 SV-1                                                  | L1_MOUSE       | 102 kDa  | 1.82  | 2.98   | 1.82  | 2.98   | 0.8  |
| 527 | Exosome component 10 OS-Mus musculus GN-Exosc10 PE1-1 SV-2                                                                          | EXOSC10_MOUSE  | 101 kDa  | 1.33  | 1.15   | 1.05  | 1.82   | 0.79 |
| 528 | Nucleolar RNA helicase DDX42 OS-Mus musculus GN-Ddx42 PE1-1 SV-1                                                                    | DDX42_MOUSE    | 94 kDa   | 64.72 | 16.65  | 67.16 | 23.89  | 0.79 |
| 529 | Keratin, type I cytoskeletal 19 OS-Mus musculus GN-Krt19 PE1-1 SV-6                                                                 | KRT19_MOUSE    | 39 kDa   | 6.29  | 6.09   | 6.29  | 14.74  | 0.79 |
| 530 | gamma1-chain C region secreted form OS-Mus musculus GN-Gli3 PE1-1 SV-1                                                              | BGHI_MOUSE     | 184 kDa  | 78.97 | 145.95 | 54.54 | 104.79 | 0.79 |
| 531 | 60S ribosomal protein S15a OS-Mus musculus GN-Rps15a PE1-1 SV-2                                                                     | RPS15A_MOUSE   | 13 kDa   | 11.39 | 7.13   | 8.62  | 5.06   | 0.79 |
| 532 | RNA-binding protein 39 OS-Mus musculus GN-Rbp39 PE1-2 SV-2                                                                          | RBP39_MOUSE    | 39 kDa   | 13.34 | 4.29   | 10.46 | 4.75   | 0.78 |
| 533 | 3-methylcrotonyltransferase 12 OS-Mus musculus GN-P3mt2 PE1-1 SV-2                                                                  | P3MT2_MOUSE    | 113 kDa  | 11.5  | 4.6    | 11.5  | 4.6    | 0.78 |
| 534 | Keratin, type II cytoskeletal 2 endomerial OS-Homo sapiens GN-KRT2 PE1-1 SV-1                                                       | K22E_HUMAN     | 69 kDa   | 40.1  | 23.56  | 31.88 | 15.54  | 0.78 |
| 535 | 60S ribosomal protein L18 OS-Mus musculus GN-Rp18 PE1-2 SV-3                                                                        | RPL18_MOUSE    | 22 kDa   | 20.43 | 13.19  | 15.99 | 9.3    | 0.78 |
| 536 | DNA minimal repeat protein MMR OS-Mus musculus GN-Mmr PE1-1 SV-2                                                                    | MMR_MOUSE      | 103 kDa  | 10.26 | 2.31   | 10.11 | 3.36   | 0.78 |
| 537 | Pre-mRNA processing factor 4 OS-Mus musculus GN-Prpf4 PE1-1 SV-1                                                                    | PRPF4_MOUSE    | 107 kDa  | 5.93  | 1.82   | 4.61  | 1.54   | 0.78 |
| 538 | 60S ribosomal protein S14 OS-Mus musculus GN-Rps14 PE1-2 SV-3                                                                       | RPS14_MOUSE    | 18 kDa   | 9.8   | 3.16   | 7.99  | 3.97   | 0.77 |
| 539 | Transformin-2 protein homolog beta OS-Mus musculus GN-Tf2b PE1-1 SV-1                                                               | TF2B_MOUSE     | 93 kDa   | 9.91  | 2.27   | 6.96  | 6.98   | 0.77 |
| 540 | Helios OS-Mus musculus GN-Helios PE1-2 SV-1                                                                                         | HELIOS_MOUSE   | 82 kDa   | 2.36  | 1.82   | 2.36  | 1.82   | 0.77 |
| 541 | DNA (cytosine-5'-methyltransferase 1) OS-Mus musculus GN-Dnmt1 PE1-1 SV-5                                                           | DNMT1_MOUSE    | 183 kDa  | 5.8   | 6.78   | 41.17 | 4.42   | 0.77 |
| 542 | ATP-dependent nuclear protein Ran OS-Mus musculus GN-Ran PE1-1 SV-3                                                                 | RAN_MOUSE      | 24 kDa   | 2.24  | 2.83   | 17.23 | 3.81   | 0.77 |
| 543 | Protein inhibitor 5 OS-Mus musculus GN-Pi5 PE1-2 SV-2                                                                               | PI5_MOUSE      | 49 kDa   | 4.9   | 2.77   | 4.9   | 2.77   | 0.76 |
| 544 | RNA-binding protein 38 OS-Mus musculus GN-Rbp38 PE1-1 SV-2                                                                          | RBP38_MOUSE    | 114 kDa  | 2.78  | 4.82   | 2.1   | 3.64   | 0.76 |
| 545 | Keratin, type II cytoskeletal 1 OS-Homo sapiens GN-KRT1 PE1-1 SV-6                                                                  | K21C1_HUMAN    | 66 kDa   | 87.18 | 41.44  | 65.86 | 13.72  | 0.76 |
| 546 | DNA topoisomerase 2-alpha OS-Mus musculus GN-Top2a PE1-1 SV-2                                                                       | TOP2A_MOUSE    | 173 kDa  | 75.11 | 21.5   | 56.66 | 10.37  | 0.75 |
| 547 | 2a-2-associated transcription factor 1 OS-Mus musculus GN-Batf1 PE1-1 SV-2                                                          | BATF1_MOUSE    | 109 kDa  | 15.11 | 3.27   | 11.99 | 1.69   | 0.75 |
| 548 | SWI-SNF-related matrix-associated actin-dependent regulator of chromatin subfamily A member 5 OS-Mus musculus GN-Smardc5 PE1-1 SV-1 | SMARDC5_MOUSE  | 122 kDa  | 23.43 | 4.88   | 17.9  | 5.23   | 0.75 |
| 549 | 60S ribosomal protein L17 OS-Mus musculus GN-Rpl17 PE1-2 SV-3                                                                       | RPL17_MOUSE    | 22 kDa   | 7.11  | 4.89   | 5.3   | 2.79   | 0.75 |
| 550 | Small nuclear ribonucleoprotein T20a OS-Mus musculus GN-Ter20a PE1-1 SV-2                                                           | TER20A_MOUSE   | 36 kDa   | 3.68  | 3.47   | 4.37  | 0.15   | 0.75 |
| 551 | DNA-(apurinic or apyrimidinic site) lyase OS-Mus musculus GN-Apel1 PE1-1 SV-2                                                       | APEX1_MOUSE    | 35 kDa   | 4.93  | 1.74   | 3.2   | 3.16   | 0.74 |
| 552 | Keratin, type II cytoskeletal 3 OS-Homo sapiens GN-KRT3 PE1-1 SV-3                                                                  | K23C3_HUMAN    | 62 kDa   | 10.29 | 14.68  | 7.56  | 10.84  | 0.73 |
| 553 | Histone deacetylase complex subunit 5A1F OS-Mus musculus GN-Hdac18 PE1-1 SV-1                                                       | HDAC18         |          |       |        |       |        |      |

|     |                                                                                           |                |         |        |       |        |       |      |            |
|-----|-------------------------------------------------------------------------------------------|----------------|---------|--------|-------|--------|-------|------|------------|
| 589 | Structural maintenance of chromosomes protein 5 OS-Mus musculus GN-Smc5 PE-2 SV-1         | SMCS MOUSE     | 129 kDa | 4.48   | 3.97  | 2.8    | 3.41  | 0.62 |            |
| 590 | 595 ribosomal protein S8 OS-Mus musculus GN-R8d PE-1 SV-1                                 | R8S MOUSE      | 29 kDa  | 1.241  | 5.49  | 7.65   | 3.9   | 0.62 | 05.10.26   |
| 591 | Suppressor of RNA 1 OS-Mus musculus GN-Sup1 PE-2 SV-2                                     | SF1 MOUSE      | 12 kDa  | 1.3    | 1.3   | 1.09   | 1.28  | 0.62 | 05.10.40   |
| 592 | 605 ribosomal protein L9 OS-Mus musculus GN-R9d PE-2 SV-2                                 | RL9 MOUSE      | 22 kDa  | 4.92   | 1.19  | 2.88   | 0.71  | 0.61 | 05.10.17   |
| 593 | 605 ribosomal protein L19 OS-Mus musculus GN-R19d PE-1 SV-1                               | RL19 MOUSE     | 22 kDa  | 4.51   | 4.01  | 3.94   | 3.40  | 0.61 | 05.10.45   |
| 594 | Protein DEK OS-Mus musculus GN-DEK PE-1 SV-1                                              | DEK MOUSE      | 52 kDa  | 1.22   | 1.22  | 1.22   | 1.46  | 0.61 | 05.10.0808 |
| 595 | Nucleolar GTP-binding protein 3 OS-Mus musculus GN-G3b PE-2 SV-2                          | NOG3 MOUSE     | 83 kDa  | 4.94   | 0.9   | 2.95   | 2.69  | 0.6  | 05.10.20   |
| 596 | Lamina-associated polypeptide 2, isoform alpha/zeta OS-Mus musculus GN-LTap2 PE-1 SV-4    | LAP2A MOUSE    | 75 kDa  | 13.83  | 3.62  | 8.24   | 3.78  | 0.6  | 05.10.14   |
| 597 | Protein VPHB OS-Mus musculus GN-VPHB PE-1 SV-1                                            | VPHB MOUSE     | 109 kDa | 2.25   | 1.99  | 1.80   | 1.17  | 0.59 | 05.10.53   |
| 598 | 605 ribosomal protein L19 OS-Mus musculus GN-R19d PE-1 SV-1                               | RL19 MOUSE     | 22 kDa  | 4.51   | 4.01  | 3.94   | 3.40  | 0.59 | 05.10.17   |
| 599 | 605 ribosomal protein S7 OS-Mus musculus GN-R7d PE-2 SV-2                                 | RS7 MOUSE      | 22 kDa  | 11.31  | 5.57  | 6.67   | 2.14  | 0.59 | 05.10.24   |
| 600 | 18 kDa U5 small nuclear ribonucleoprotein component OS-Mus musculus GN-U5p15 PE-2 SV-1    | U5P15 MOUSE    | 39 kDa  | 3.06   | 2.72  | 1.78   | 1.62  | 0.58 | 05.10.52   |
| 601 | 605 ribosomal protein L4 OS-Mus musculus GN-R4d PE-1 SV-2                                 | RL4 MOUSE      | 42 kDa  | 3.85   | 3.46  | 11.4   | 5.8   | 0.58 | 05.10.099  |
| 602 | 605 ribosomal protein L7 OS-Mus musculus GN-R7d PE-2 SV-2                                 | RL7 MOUSE      | 31 kDa  | 19.38  | 17.28 | 11.2   | 9.71  | 0.58 | 05.10.52   |
| 603 | 605 ribosomal protein L3 OS-Mus musculus GN-R3d PE-2 SV-3                                 | RL3 MOUSE      | 46 kDa  | 25.38  | 12.86 | 14.62  | 6.33  | 0.58 | 05.10.27   |
| 604 | Myosin-3 OS-Mus musculus GN-My3 PE-1 SV-4                                                 | MYH3 MOUSE     | 226 kDa | 19.96  | 3.44  | 11.25  | 2.88  | 0.57 | 05.10.392  |
| 605 | 605 ribosomal protein S28 OS-Mus musculus GN-R28d PE-1 SV-3                               | RS28 MOUSE     | 13 kDa  | 10.09  | 13.0  | 8.63   | 3.1   | 0.56 | 05.10.38   |
| 606 | Trypsin OS-Bus scrofa PE-1 SV-1                                                           | TRYP PGD       | 24 kDa  | 29.93  | 27.25 | 16.82  | 29.14 | 0.56 | 05.10.60   |
| 607 | 18 kDa U5 small nuclear ribonucleoprotein component OS-Mus musculus GN-U5p15 PE-2 SV-1    | U5P15 MOUSE    | 109 kDa | 2.109  | 9.11  | 11.74  | 1.09  | 0.56 | 05.10.15   |
| 608 | Spurthiller unrelated activity 2 like 2 OS-Mus musculus GN-Sv22 PE-2 SV-1                 | SV22 MOUSE     | 118 kDa | 3.77   | 4.22  | 2.1    | 3.64  | 0.56 | 05.10.63   |
| 609 | Mortality factor 4-like protein 2 OS-Mus musculus GN-Mor42 PE-1 SV-1                      | MOL2 MOUSE     | 32 kDa  | 1.89   | 3.27  | 1.05   | 1.82  | 0.56 | 05.10.72   |
| 610 | Purified ATP-dependent RNA helicase DDX33 OS-Mus musculus GN-Ddx33 PE-1 SV-1              | DDX33 MOUSE    | 78 kDa  | 1.32   | 2.29  | 0.73   | 1.27  | 0.56 | 05.10.72   |
| 611 | Serum albumin OS-Mus musculus GN-Alb PE-1 SV-3                                            | ALBU MOUSE     | 69 kDa  | 3.82   | 6.62  | 2.11   | 3.64  | 0.55 | 05.10.73   |
| 612 | Structural maintenance of chromosomes protein 3 OS-Mus musculus GN-Smc3 PE-1 SV-2         | SMCS MOUSE     | 142 kDa | 31.8   | 6.93  | 17.45  | 3.31  | 0.55 | 05.10.392  |
| 613 | 605 ribosomal protein S11 OS-Mus musculus GN-R11d PE-2 SV-3                               | RS11 MOUSE     | 18 kDa  | 14.28  | 8.77  | 7.84   | 5.33  | 0.55 | 05.10.34   |
| 614 | Nucleolar protein 58 OS-Mus musculus GN-N58 PE-1 SV-1                                     | NPP58 MOUSE    | 80 kDa  | 17.61  | 4.42  | 9.69   | 3.84  | 0.55 | 05.10.83   |
| 615 | 605 ribosomal protein L19 OS-Mus musculus GN-R19d PE-2 SV-3                               | RL19 MOUSE     | 22 kDa  | 4.51   | 4.01  | 3.94   | 3.40  | 0.55 | 05.10.17   |
| 616 | 605 ribosomal protein L6 OS-Mus musculus GN-R6d PE-1 SV-3                                 | RL6 MOUSE      | 34 kDa  | 19.89  | 6.42  | 10.71  | 6.92  | 0.54 | 05.10.83   |
| 617 | 605 ribosomal protein L5 OS-Mus musculus GN-R5d PE-1 SV-3                                 | RL5 MOUSE      | 34 kDa  | 12.38  | 5.33  | 6.69   | 3.08  | 0.54 | 05.10.18   |
| 618 | Keratin, type II cytokeletal 5 OS-Mus musculus GN-K5 PE-1 SV-3                            | KRT5A HUMAN    | 46 kDa  | 12.98  | 14.28 | 11.4   | 11.4  | 0.54 | 05.10.82   |
| 619 | rRNA 2'-O-methyltransferase Nflarinin OS-Mus musculus GN-NFM PE-1 SV-2                    | NFLR MOUSE     | 20 kDa  | 20.13  | 2.36  | 10.79  | 1.32  | 0.54 | 05.10.0930 |
| 620 | Plastin-2 OS-Mus musculus GN-Pl2 PE-1 SV-4                                                | PLS2 MOUSE     | 70 kDa  | 5.77   | 5.04  | 3.09   | 1.89  | 0.53 | 05.10.44   |
| 621 | Keratin, type II cytokeletal 5 OS-Mus musculus GN-K5 PE-1 SV-3                            | KRT5C MOUSE    | 52 kDa  | 12.98  | 11.74 | 6.80   | 9.84  | 0.53 | 05.10.53   |
| 622 | 15 small nuclear ribonucleoprotein 200 kDa helicase OS-Homo sapiens GN-SNRNP200 PE-1 SV-2 | SNRNP200 HUMAN | 200 kDa | 16.47  | 14.61 | 9      | 20.39 | 0.53 | 05.10.54   |
| 623 | Scaffold attachment factor 82 OS-Mus musculus GN-Saf82 PE-1 SV-2                          | SAF82 MOUSE    | 112 kDa | 1.81   | 6.81  | 3.54   | 4.36  | 0.52 | 05.10.52   |
| 624 | 605 ribosomal protein S4 X isoform OS-Mus musculus GN-R4Xd PE-2 SV-2                      | RS4X MOUSE     | 30 kDa  | 1.861  | 2.41  | 9.56   | 2.27  | 0.52 | 05.10.0808 |
| 625 | Pinpoint amphiphilic coiled protein Snc1 OS-Mus musculus GN-Snc1 PE-1 SV-3                | SNC1 MOUSE     | 45 kDa  | 1.29   | 1.17  | 1.17   | 1.17  | 0.52 | 05.10.54   |
| 626 | SUMO-activating enzyme subunit 1 OS-Mus musculus GN-Sae1 PE-2 SV-1                        | SAE1 MOUSE     | 39 kDa  | 2.91   | 2.98  | 1.5    | 2.6   | 0.52 | 05.10.54   |
| 627 | ATP-dependent RNA helicase DDX38A OS-Mus musculus GN-Ddx38a PE-2 SV-1                     | DDX38A MOUSE   | 49 kDa  | 32.09  | 10.99 | 16.57  | 18.31 | 0.52 | 05.10.24   |
| 628 | 605 ribosomal protein S19 OS-Mus musculus GN-R19d PE-1 SV-3                               | RS19 MOUSE     | 19 kDa  | 3.68   | 3.91  | 3.63   | 2.79  | 0.52 | 05.10.32   |
| 629 | Transcription elongation factor 1 OS-Mus musculus GN-Tef1 PE-1 SV-2                       | TEF1 MOUSE     | 62 kDa  | 2.24   | 4.04  | 2.24   | 4.04  | 0.52 | 05.10.43   |
| 630 | DNA-directed RNA polymerase II subunit RPB2 OS-Mus musculus GN-Rpb2 PE-2 SV-2             | RPB2 MOUSE     | 134 kDa | 3.28   | 1.34  | 1.69   | 1.58  | 0.51 | 05.10.25   |
| 631 | 15 small nuclear ribonucleoprotein 200 kDa helicase OS-Mus musculus GN-Snrp200 PE-2 SV-1  | SNRP200 HUMAN  | 6 kDa   | 4.81   | 2.87  | 22.16  | 4.19  | 0.51 | 05.10.0818 |
| 632 | Keratin, type I cytokeletal 42 OS-Mus musculus GN-K42 PE-1 SV-1                           | KCTC42 MOUSE   | 42 kDa  | 3.4    | 4.44  | 2.3    | 4.44  | 0.51 | 05.10.34   |
| 633 | DNA ligase 1 OS-Mus musculus GN-Lig1 PE-1 SV-2                                            | DNL1 MOUSE     | 109 kDa | 10.12  | 5.59  | 5.11   | 4.21  | 0.51 | 05.10.28   |
| 634 | Zinc finger protein 638 OS-Mus musculus GN-Zf638 PE-1 SV-2                                | ZNF638 MOUSE   | 218 kDa | 2.06   | 3.81  | 1.05   | 1.82  | 0.51 | 05.10.80   |
| 635 | 605 ribosomal protein S2 OS-Mus musculus GN-R2d PE-1 SV-3                                 | RS2 MOUSE      | 31 kDa  | 14.96  | 6.59  | 12.93  | 4.63  | 0.51 | 05.10.36   |
| 636 | 605 ribosomal protein S28 OS-Mus musculus GN-R28d PE-1 SV-3                               | RS28 MOUSE     | 13 kDa  | 10.09  | 13.0  | 8.63   | 3.1   | 0.51 | 05.10.38   |
| 637 | 605 ribosomal protein S3 OS-Mus musculus GN-R3d PE-1 SV-3                                 | RS3 MOUSE      | 27 kDa  | 20.21  | 6.44  | 14.91  | 4.65  | 0.49 | 05.10.30   |
| 638 | Cell growth-regulating nuclear protein OS-Mus musculus GN-CGRN PE-1 SV-2                  | LYAR MOUSE     | 44 kDa  | 4.2    | 6.59  | 2.1    | 3.94  | 0.49 | 05.10.39   |
| 639 | Protein protein kinase 4718 OS-Mus musculus GN-Pk4718 PE-1 SV-2                           | PK4718 MOUSE   | 47 kDa  | 1.29   | 1.12  | 1.12   | 1.12  | 0.49 | 05.10.87   |
| 640 | DNA topoisomerase 1 OS-Mus musculus GN-Top1 PE-1 SV-2                                     | TOP1 MOUSE     | 81 kDa  | 14.22  | 4.69  | 6.84   | 3.5   | 0.48 | 05.10.94   |
| 641 | Piv-1 mRNA-splicing factor 3B OS-Mus musculus GN-Piv3B PE-1 SV-1                          | P3B MOUSE      | 37 kDa  | 4      | 1.19  | 1.19   | 1.81  | 0.48 | 05.10.17   |
| 642 | DNA-directed RNA polymerase II subunit RPB1 OS-Mus musculus GN-Rpb1 PE-1 SV-3             | RPB1 MOUSE     | 217 kDa | 3.31   | 3.38  | 1.63   | 1.48  | 0.47 | 05.10.47   |
| 643 | Subunit A1P-dependent RNA helicase DDX38 OS-Mus musculus GN-Ddx38 PE-2 SV-1               | DDX38A HUMAN   | 3 kDa   | 3.04   | 2.95  | 1.4    | 2.43  | 0.47 | 05.10.43   |
| 644 | Histone H3.2 OS-Mus musculus GN-H3.2 PE-1 SV-2                                            | H3Z MOUSE      | 15 kDa  | 44.22  | 21.28 | 20.21  | 12.06 | 0.46 | 05.10.46   |
| 645 | Serum albumin OS-Bos taurus GN-Alb PE-1 SV-4                                              | ALBU BOVIN     | 69 kDa  | 23.11  | 21.11 | 10.29  | 10.17 | 0.45 | 05.10.40   |
| 646 | Diquin-45 OS-Mus musculus GN-D45 PE-1 SV-2                                                | D45A MOUSE     | 45 kDa  | 6.49   | 18.11 | 14.6   | 12.3  | 0.45 | 05.10.31   |
| 647 | Y heavy chain V region AC38 205 12 OS-Mus musculus GN-Rh2a PE-1 SV-1                      | HVMS1 MOUSE    | 13 kDa  | 12.89  | 1.78  | 5.78   | 5.15  | 0.45 | 05.10.68   |
| 648 | 605 ribosomal protein L8 OS-Mus musculus GN-R8d PE-2 SV-2                                 | RL8 MOUSE      | 28 kDa  | 18.19  | 10.36 | 8.09   | 6.72  | 0.44 | 05.10.17   |
| 649 | Gene 38 protein OS-Mus musculus GN-G38 PE-1 SV-3                                          | G38B MOUSE     | 69 kDa  | 2.9    | 2.9   | 2.9    | 2.9   | 0.44 | 05.10.53   |
| 650 | Keratin, type I cytokeletal 10 OS-Mus musculus GN-K10 PE-1 SV-3                           | KCTC10 MOUSE   | 35 kDa  | 16.51  | 10.50 | 7.01   | 12.14 | 0.42 | 05.10.35   |
| 651 | DNA repair protein Rad50 OS-Mus musculus GN-Rad50 PE-1 SV-1                               | RAD50 MOUSE    | 153 kDa | 4.22   | 1.3   | 1.8    | 3.12  | 0.42 | 05.10.28   |
| 652 | Keratin, type I cytokeletal 12 OS-Homo sapiens GN-K12 PE-1 SV-4                           | KCTC12 HUMAN   | 51 kDa  | 14.72  | 16.34 | 6.09   | 9.28  | 0.41 | 05.10.43   |
| 653 | Keratin, type I cytokeletal 17 OS-Homo sapiens GN-K17 PE-1 SV-1                           | KCTC17 HUMAN   | 52 kDa  | 9.56   | 11.01 | 6.21   | 12.9  | 0.41 | 05.10.47   |
| 654 | Enhancer of rudimentary histone OS-Mus musculus GN-Erh PE-1 SV-1                          | ERH MOUSE      | 12 kDa  | 2.2    | 3.82  | 0.8    | 1.56  | 0.41 | 05.10.61   |
| 655 | 605 ribosomal protein L28 OS-Mus musculus GN-R28d PE-1 SV-2                               | RL28 MOUSE     | 16 kDa  | 8.76   | 7.39  | 3.9    | 6.76  | 0.4  | 05.10.37   |
| 656 | Quantitative multidomain protein OS-Mus musculus GN-QM1 PE-1 SV-3                         | QM1 MOUSE      | 12 kDa  | 1.2    | 2.39  | 4.11   | 2.39  | 0.4  | 05.10.88   |
| 657 | 605 ribosomal protein S24 OS-Mus musculus GN-R24 PE-1 SV-1                                | RS24 MOUSE     | 15 kDa  | 4.53   | 4.08  | 1.8    | 3.12  | 0.4  | 05.10.41   |
| 658 | Activity-dependent neurotrophin receptor OS-Mus musculus GN-Adnp PE-2 SV-1                | ADNP MOUSE     | 92 kDa  | 2.28   | 2.04  | 0.9    | 1.56  | 0.4  | 05.10.41   |
| 659 | 605 ribosomal protein S20 OS-Mus musculus GN-R20d PE-1 SV-1                               | RS20 MOUSE     | 13 kDa  | 2.69   | 2.5   | 1.05   | 1.82  | 0.39 | 05.10.41   |
| 660 | 605 ribosomal protein S24 OS-Mus musculus GN-R24 PE-2 SV-2                                | RS24 MOUSE     | 15 kDa  | 4.53   | 4.08  | 1.8    | 3.12  | 0.39 | 05.10.41   |
| 661 | 1-complex protein 1 subunit delta OS-Mus musculus GN-Cd4 PE-1 SV-3                        | TCPO MOUSE     | 98 kDa  | 1.27   | 0.68  | 0.68   | 1.04  | 0.38 | 05.10.59   |
| 662 | Bromodomain associated to one finger domain protein 1A OS-Mus musculus GN-Baf1A PE-1 SV-3 | BAZF1A MOUSE   | 178 kDa | 1.51   | 2.73  | 0.64   | 1.04  | 0.38 | 05.10.59   |
| 663 | Isolation factor C OS-Mus musculus GN-IFC PE-1 SV-2                                       | IFC1 MOUSE     | 28 kDa  | 1.84   | 1.5   | 1.5    | 1.5   | 0.38 | 05.10.38   |
| 664 | Keratin, type I cytokeletal 14 OS-Homo sapiens GN-K14 PE-1 SV-4                           | KCTC14 HUMAN   | 52 kDa  | 17.14  | 19.63 | 6.31   | 10.93 | 0.37 | 05.10.45   |
| 665 | Thyroid hormone receptor-associated protein 3 OS-Mus musculus GN-Thrap3 PE-1 SV-1         | TRHP3 MOUSE    | 108 kDa | 21.29  | 11.13 | 7.78   | 8.88  | 0.37 | 05.10.10   |
| 666 | Serine arginine repeat-rich protein 2 OS-Mus musculus GN-Srpm2 PE-1 SV-3                  | SRRM2 MOUSE    | 298 kDa | 12.93  | 7.86  | 4.71   | 4.31  | 0.36 | 05.10.46   |
| 667 | 605 ribosomal protein L28 OS-Mus musculus GN-R28d PE-1 SV-2                               | RL28 MOUSE     | 16 kDa  | 8.76   | 7.39  | 4.0    | 6.76  | 0.36 | 05.10.36   |
| 668 | Nucleolar protein 11 OS-Mus musculus GN-N11 PE-2 SV-1                                     | NOL11 MOUSE    | 81 kDa  | 1.98   | 0.1   | 0.7    | 1.21  | 0.35 | 05.10.14   |
| 669 | SAP domain-containing ribonucleoprotein OS-Mus musculus GN-Srpm PE-1 SV-3                 | SRRM PE1 MOUSE | 24 kDa  | 1.57   | 1.46  | 1.8    | 1.97  | 0.34 | 05.10.93   |
| 670 | Histone H1.2 OS-Mus musculus GN-H1.2 PE-1 SV-2                                            | H1Z MOUSE      | 14 kDa  | 6.4    | 6.4   | 20.6   | 5.27  | 0.34 | 05.10.62   |
| 671 | Nuclear RNA export factor 1 OS-Mus musculus GN-Nxf1 PE-1 SV-3                             | NXF1 MOUSE     | 70 kDa  | 3.09   | 3.78  | 1.05   | 1.82  | 0.34 | 05.10.45   |
| 672 | Heat shock 70 kDa protein 4 OS-Mus musculus GN-Hsp4 PE-1 SV-1                             | HSP4 MOUSE     | 64 kDa  | 4.92   | 4.4   | 1.65   | 1.58  | 0.34 | 05.10.29   |
| 673 | 605 ribosomal protein S19 OS-Mus musculus GN-R19d PE-1 SV-3                               | RS19 MOUSE     | 19 kDa  | 3.68   | 3.27  | 0.6    | 1.04  | 0.32 | 05.10.36   |
| 674 | 605 ribosomal protein S2 OS-Mus musculus GN-R2d PE-2 SV-2                                 | RS2 MOUSE      | 31 kDa  | 14.96  | 6.59  | 12.93  | 4.63  | 0.31 | 05.10.35   |
| 675 | Vimentin OS-Mus musculus GN-Vim PE-1 SV-3                                                 | VIME MOUSE     | 52 kDa  | 12.78  | 10.68 | 10.23  | 4.81  | 0.31 | 05.10.29   |
| 676 | 605 ribosomal protein L32 OS-Mus musculus GN-R32 PE-2 SV-2                                | RL32 MOUSE     | 16 kDa  | 2.89   | 2.53  | 0.48   | 1.56  | 0.31 | 05.10.31   |
| 677 | 605 ribosomal protein L32 OS-Mus musculus GN-R32 PE-2 SV-2                                | RL32 MOUSE     | 16 kDa  | 2.89   | 2.53  | 0.48   | 1.56  | 0.31 | 05.10.31   |
| 678 | WD repeat-containing protein 48 OS-Mus musculus GN-Wr48 PE-2 SV-1                         | WR48 MOUSE     | 69 kDa  | 2.38   | 2.15  | 0.73   | 1.27  | 0.31 | 05.10.32   |
| 679 | Elongation factor 1-gamma OS-Mus musculus GN-Ef1g PE-1 SV-3                               | EF1G MOUSE     | 50 kDa  | 7.87   | 2.4   | 2.4    | 4.16  | 0.31 | 05.10.12   |
| 680 | Arational endonuclease III-like protein OS-Mus musculus GN-Vep PE-1 SV-4                  | VEP1 MOUSE     | 4.6 kDa | 4.56   | 4.73  | 1.23   | 1.3   | 0.31 | 05.10.23   |
| 681 | Histone H4 OS-Mus musculus GN-H4 PE-1 SV-2                                                | H4Z MOUSE      | 15 kDa  | 19.833 | 87.82 | 40.51  | 19.32 | 0.29 | 05.10.14   |
| 682 | DNA-binding protein 23 OS-Mus musculus GN-Rb23 PE-1 SV-1                                  | RBM23 MOUSE    | 100 kDa | 3.26   | 9.85  | 1.9    | 2.6   | 0.29 | 05.10.79   |
| 683 | Histone H2B type 1-O-E OS-Mus musculus GN-H2b1b PE-1 SV-3                                 | H2B1B MOUSE    | 14 kDa  | 10.39  | 69.89 | 26.65  | 16.29 | 0.27 | 05.10.15   |
| 684 | Histone H2A OS-Mus musculus GN-H2A PE-1 SV-2                                              | H2AZ MOUSE     | 12 kDa  | 9.74   | 12.9  | 1.85   | 12.9  | 0.27 | 05.10.13   |
| 685 | 605 ribosomal protein L36 OS-Mus musculus GN-R36d PE-1 SV-3                               | RL36 MOUSE     | 12 kDa  | 2.28   | 2.49  | 0.8    | 1.04  | 0.26 | 05.10.34   |
| 686 | Proliferation-associated protein 204 OS-Mus musculus GN-Pa204 PE-1 SV-3                   | PA204 MOUSE    | 44 kDa  | 1.892  | 12.87 | 5.14   | 4.86  | 0.26 | 05.10.13   |
| 687 | Lamin-B receptor OS-Mus musculus GN-LBR PE-1 SV-1                                         | LBR MOUSE      | 111 kDa | 3.29   | 1.23  | 3.29   | 1.23  | 0.26 | 05.10.87   |
| 688 | 605 ribosomal protein L31 OS-Mus musculus GN-R31d PE-1 SV-1                               | RL31 MOUSE     | 2.98    | 2.99   | 0.71  | 1.21   | 0.24  | 0.26 | 05.10.64   |
| 689 | Pinn OS-Mus musculus GN-Pin1 PE-1 SV-4                                                    | PRN1 MOUSE     | 82 kDa  | 2.59   | 2.48  | 0.8    | 1.04  | 0.22 | 05.10.27   |
| 690 | Histone H1 OS-Mus musculus GN-H1 PE-1 SV-2                                                | H1Z MOUSE      | 32 kDa  | 22.75  | 12.01 | 7.22   | 3.85  | 0.22 | 05.10.25   |
| 691 | 605 ribosomal protein L28 OS-Mus musculus GN-R28d PE-1 SV-2                               | RL28 MOUSE     | 16 kDa  | 8.76   | 7.39  | 6.1    | 6.76  | 0.22 | 05.10.36   |
| 692 | Histone H1.2 OS-Mus musculus GN-H1.2 PE-1 SV-2                                            | H1Z MOUSE      | 14 kDa  | 4.73   | 4.73  | 6.8    | 15.24 | 0.21 | 05.10.20   |
| 693 | Lamin-B1 receptor OS-Mus musculus GN-LBR1 PE-1 SV-3                                       | LBR1L1 MOUSE   | 67 kDa  | 3.458  | 4.18  | 6.34</ |       |      |            |
